# Supplementary material for: Synthesis of 2,4-diarylsubstituted-pyridines through a Ru-catalyzed four component reaction
Source: Royal Society of Chemistry journal article supplement (doi:10.1039/c5ob00162e), 2015-01-01

## Supporting information for

### Synthesis of 2,4-diarylsubstituted-pyridines through Ru-catalyzed four component reaction

Yang Bai,<sup>a</sup> Lichang Tang,<sup>a</sup> Huawen Huang,<sup>a</sup> and Guo-Jun Deng<sup>a, b\*</sup>

<sup>a</sup> Key Laboratory of Environmentally Friendly Chemistry and Application of Ministry of Education, College of Chemistry, Xiangtan University, Xiangtan 411105, China; Fax: (+86)-731-58292251; e-mail: gjdeng@xtu.edu.cn

<sup>b</sup> Key Laboratory of Molecular Recognition and Function, Institute of Chemistry, Chinese Academy of Sciences, Beijing 100080, China.

#### Table of Contents

|                                                                              |              |
|------------------------------------------------------------------------------|--------------|
| <b>1. General information</b>                                                | <b>2</b>     |
| <b>2. General procedure for synthesis of pyridines</b>                       | <b>2</b>     |
| <b>3. Characterization data of products</b>                                  | <b>3-10</b>  |
| <b>4. References</b>                                                         | <b>11</b>    |
| <b>5. Copies of <sup>1</sup>H and <sup>13</sup>C NMR spectra of products</b> | <b>12-31</b> |

### General information:

All experiments were carried out under an atmosphere of oxygen. Flash column chromatography was performed over silica gel 48-75  $\mu\text{m}$ .  $^1\text{H}$  NMR and  $^{13}\text{C}$  NMR spectra were recorded on Bruker-AV (400 and 100 MHz, respectively) instrument internally referenced to  $\text{SiMe}_4$  or chloroform signals. MS analyses were performed on an Agilent5975 GC-MS instrument (EI). The new compounds were characterized by  $^1\text{H}$  NMR,  $^{13}\text{C}$  NMR, MS, HRMS. Unless otherwise noted, all reagents were obtained from commercial suppliers and used without further purification. Ruthenium salts and acetophenones **1a**, **1b**, **1e**, **1i**, **1j**, **1k**, **1l**, **1n**, **1p** were purchased from Aladdin, **1c**, **1d**, **1f**, **1g**, **1h**, **1m**, **1o**, **1q**, **1r** were purchased from Accela. All of these were used as received without further purification.

### General procedure for synthesis of diarylpyridine (2a):

A 20 mL reaction vessel was charged with  $\text{RuCl}_3 \cdot 3\text{H}_2\text{O}$  (2.6 mg, 0.01 mmol), acetophenone (**1a**, 48  $\mu\text{L}$ , 0.4 mmol),  $\text{NH}_4\text{OAc}$  (46.2 mg, 0.6 mmol). The sealed reaction vessel was purged with oxygen three times. DMF (0.5 mL) was added to the sealed reaction vessel by syringe. The resulting solution was stirred at 120  $^\circ\text{C}$  for 24 h. After cooling to room temperature, the volatiles were removed under vacuum and the residue was purified by column chromatography (silica gel, petroleum ether/dichloromethane = 3:1) to give 36.8 mg **2a** as pale yellow oil; yield 80%.

### 2,4-Diphenylpyridine(2a)<sup>[1]</sup>

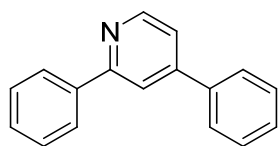

$^1\text{H}$  NMR (400 MHz,  $\text{CDCl}_3$ , ppm)  $\delta$  8.74 (d,  $J = 5.2$  Hz, 1H), 8.05 (d,  $J = 7.6$  Hz, 2H), 7.93 (s, 1H), 7.70 (m, 2H), 7.53–7.42 (m, 7H);  $^{13}\text{C}$  NMR (100 MHz,  $\text{CDCl}_3$ , ppm)  $\delta$  158.1, 150.1, 149.3, 139.5, 138.6, 138.6, 129.1, 129.0, 128.7, 127.1, 127.0, 120.3, 118.7; MS (EI)  $m/z$  (%) 231 (100), 202, 154, 102, 77.

### 2,4-Diptolylpyridine (2b)<sup>[1]</sup>

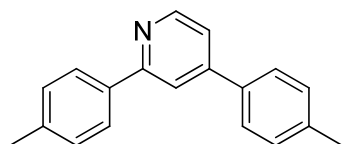

The reaction was conducted with 1-p-tolyloethanone (**1b**, 53.7 mg, 0.4 mmol). The residue was purified by column chromatography (silica gel, petroleum ether/dichloromethane = 3:1) to give **2b** as off-white solid; yield 76%; mp 105-107 °C.

<sup>1</sup>H NMR (400 MHz, CDCl<sub>3</sub>) δ 8.69 (d, *J* = 5.2 Hz, 1H), 7.94 (d, *J* = 8.0 Hz, 2H), 7.89 (s, 1H), 7.59 (d, *J* = 8.0 Hz, 2H), 7.41 (d, *J* = 4.0 Hz, 1H), 7.32-7.30 (m, 4H), 2.43 (s, 3H), 2.42 (s, 3H); <sup>13</sup>C NMR (100 MHz, CDCl<sub>3</sub>, ppm) δ 158.0, 149.9, 149.0, 139.0, 138.9, 136.7, 135.6, 129.7, 129.4, 126.8, 126.8, 119.7, 118.1, 21.2, 21.1; MS (EI) *m/z* (%) 259 (100), 244, 115, 91, 77.

#### 2,4-Bis(4-*tert*-butylphenyl)pyridine (**2c**)

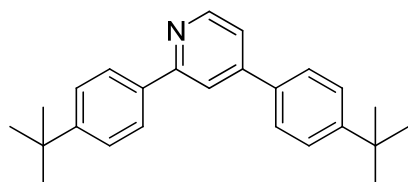

The reaction was conducted with 1-(4-*tert*-butylphenyl)ethanone (**1c**, 70.5 mg, 0.4 mmol). The residue was purified by column chromatography (silica gel, petroleum ether/dichloromethane = 3:1) to give **2c** as off-white solid; yield 70%; mp 83-86 °C.

<sup>1</sup>H NMR (400 MHz, CDCl<sub>3</sub>) δ 8.70 (d, *J* = 5.2 Hz, 1H), 7.97 (d, *J* = 8.2 Hz, 2H), 7.91 (s, 1H), 7.64 (d, *J* = 8.0 Hz, 2H), 7.54-7.50 (m, 4H), 7.41 (d, *J* = 5.2 Hz, 1H), 1.38 (s, 9H), 1.37 (s, 9H); <sup>13</sup>C NMR (100 MHz, CDCl<sub>3</sub>, ppm) δ 158.0, 152.3, 152.1, 149.9, 149.0, 136.8, 135.7, 126.7, 126.0, 125.7, 119.8, 118.3, 34.7, 34.7, 31.3, 31.3; MS (EI) *m/z* (%) 343, 328 (100), 312, 128, 77; HRMS calcd. for: C<sub>25</sub>H<sub>29</sub>N [M+H]<sup>+</sup> 344.2373, found 344.2372.

#### 2,4-Bis(4-isobutylphenyl)pyridine (**2d**)

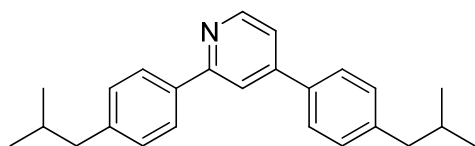

The reaction was conducted with 1-(4-isobutylphenyl)ethanone (**1d**, 70.5 mg, 0.4 mmol). The residue was purified by column chromatography (silica gel, petroleum ether/dichloromethane =

3:1) to give **2d** as off-white solid; yield 68%; mp 90-93 °C.

<sup>1</sup>H NMR (400 MHz, CDCl<sub>3</sub>, ppm) δ 8.69 (d, *J* = 5.2 Hz, 1H), 7.95 (d, *J* = 8.0 Hz, 2H), 7.91 (s, 1H), 7.61 (d, *J* = 8.0 Hz, 2H), 7.42 (d, *J* = 4.8 Hz, 1H), 7.29-7.26 (m, 4H), 2.54 (d, *J* = 6.0 Hz, 4H), 1.95-1.89 (m, 2H), 0.95-0.93 (m, 12H); <sup>13</sup>C NMR (100 MHz, CDCl<sub>3</sub>, ppm) δ 158.1, 149.9, 149.1, 142.9, 142.7, 137.1, 135.9, 129.8, 129.5, 126.8, 126.7, 119.7, 118.2, 45.2, 45.1, 30.2, 30.2, 22.4; MS (EI) *m/z* (%) 343, 300 (100), 257, 91, 77; HRMS calcd. for: C<sub>25</sub>H<sub>29</sub>N [M+H]<sup>+</sup> 344.2372, found 344.2372.

### 2,4-Bis(4-methoxyphenyl)pyridine (**2e**)<sup>[1]</sup>

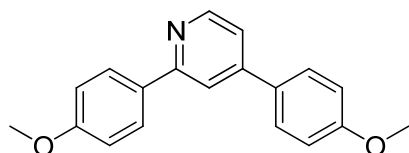

The reaction was conducted with 1-(4-methoxyphenyl)ethanone (**1e**, 60.1 mg, 0.4 mmol). The residue was purified by column chromatography (silica gel, petroleum ether/dichloromethane = 3:1) to give **2e** as off-white solid; yield 65%; mp 133-135 °C.

<sup>1</sup>H NMR (400 MHz, CDCl<sub>3</sub>, ppm) δ 8.65 (d, *J* = 4.8 Hz, 1H), 8.01 (d, *J* = 8.8 Hz, 2H), 7.83 (s, 1H), 7.65 (d, *J* = 8.4 Hz, 2H), 7.36 (d, *J* = 4.0 Hz, 1H), 7.04-7.01 (m, 4H), 3.88 (s, 6H); <sup>13</sup>C NMR (100 MHz, CDCl<sub>3</sub>, ppm) δ 160.5, 157.6, 149.9, 148.6, 132.2, 130.9, 129.8, 128.2, 128.1, 119.0, 117.3, 114.5, 114.1, 55.3, 55.3; MS (EI) *m/z* (%) 291 (100), 276, 204, 145, 77.

### 2,4-Bis(3-methoxyphenyl)pyridine (**2f**)<sup>[1]</sup>

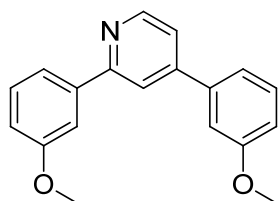

The reaction was conducted with 1-(3-methoxyphenyl)ethanone (**1f**, 60.1 mg, 0.4 mmol). The residue was purified by column chromatography (silica gel, petroleum ether/dichloromethane = 3:1) to give **2f** as orange oil; yield 68%.

<sup>1</sup>H NMR (400 MHz, CDCl<sub>3</sub>, ppm) δ 8.73 (d, *J* = 4.8 Hz, 1H), 7.90 (s, 1H), 7.63-7.59 (m, 2H), 7.44-7.38 (m, 3H), 7.28 (s, 1H), 7.20 (s, 1H), 7.00-6.98 (m, 2H), 3.91 (s, 3H), 3.89 (s, 3H); <sup>13</sup>C NMR (100 MHz, CDCl<sub>3</sub>, ppm) δ 160.2, 160.1, 157.9, 149.9, 149.2, 140.9, 140.0, 130.1, 129.7,

120.4, 119.5, 119.4, 118.9, 115.1, 114.3, 112.9, 112.2, 55.4, 55.3; MS (EI) m/z (%) 291 (100), 261, 204, 145, 77.

### 2,4-Di(biphenyl-4-yl)pyridine (**2g**)<sup>[1]</sup>

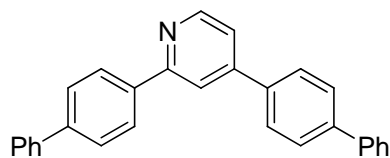

The reaction was conducted with 1-(biphenyl-4-yl)ethanone (**1g**, 78.5 mg, 0.4 mmol). The residue was purified by column chromatography (silica gel, petroleum ether/dichloromethane = 3:1) to give **2g** as a light-yellow solid; yield 48%; mp 176-178 °C.

<sup>1</sup>H NMR (400 MHz, CDCl<sub>3</sub>, ppm)  $\delta$  8.78 (d,  $J$  = 4.0 Hz, 1H), 8.16 (d,  $J$  = 7.2 Hz, 2H), 8.03 (s, 1H), 7.82-7.68 (m, 10H), 7.49-7.38 (m, 7H); <sup>13</sup>C NMR (100 MHz, CDCl<sub>3</sub>, ppm)  $\delta$  157.7, 150.2, 148.8, 141.9, 141.8, 140.5, 140.2, 138.3, 137.3, 128.9, 128.8, 127.8, 127.7, 127.5, 127.4, 127.4, 127.1, 120.1, 118.5.

### 2,4-Bis(4-(methylsulfonyl)phenyl)pyridine (**2h**)

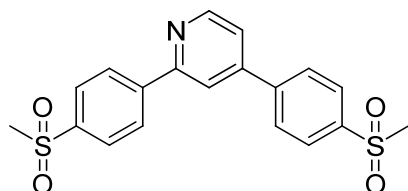

The reaction was conducted with 1-(4-(methylsulfonyl)phenyl)ethanone (**1h**, 79.3 mg, 0.4 mmol). The residue was purified by column chromatography (silica gel, petroleum ether/ethyl acetate = 1:1) to give **2h** as a yellow solid; yield 57%; mp 248-249 °C.

<sup>1</sup>H NMR (400 MHz, CDCl<sub>3</sub>, ppm)  $\delta$  8.86 (d,  $J$  = 4.8 Hz, 1H), 8.28 (d,  $J$  = 8.0 Hz, 2H), 8.13-8.08 (m, 4H), 7.99 (s, 1H), 7.89 (d,  $J$  = 8.0 Hz, 2H), 7.56 (d,  $J$  = 4.8 Hz, 1H), 3.13 (s, 3H), 3.12 (s, 3H); <sup>13</sup>C NMR (100 MHz, CDCl<sub>3</sub>, ppm)  $\delta$  156.3, 150.8, 147.8, 144.1, 143.6, 141.2, 141.0, 128.8, 128.4, 128.2, 128.0, 121.5, 119.4, 44.6, 44.5; HRMS calcd. for: C<sub>19</sub>H<sub>18</sub>O<sub>4</sub>NS<sub>2</sub> [M+H]<sup>+</sup> 388.0672, found 388.0667.

### 4,4'-(Pyridine-2,4-diyl)dibenzonitrile (**2i**)

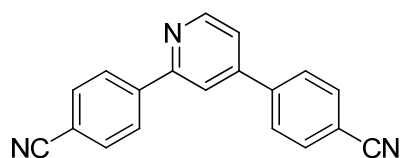

The reaction was conducted with 4-acetylbenzointrile (**1i**, 58.1 mg, 0.4 mmol). The residue was purified by column chromatography (silica gel, petroleum ether/dichloromethane = 3:1) to give **2i** as pale yellow solid; yield 45%; mp 175-178 °C.

<sup>1</sup>H NMR (400 MHz, CDCl<sub>3</sub>, ppm) δ 8.84 (d, *J* = 4.2 Hz, 1H), 8.26-8.17 (m, 2H), 7.94 (s, 1H), 7.84-7.80 (m, 6H), 7.52 (d, *J* = 4.4 Hz, 1H); <sup>13</sup>C NMR (100 MHz, CDCl<sub>3</sub>, ppm) δ 156.2, 150.7, 147.7, 142.9, 138.2, 132.9, 132.5, 132.5, 127.8, 127.5, 127.4, 121.2, 120.2, 118.9, 118.2; MS (EI) *m/z* (%) 281 (100), 252, 179, 127, 75; HRMS calcd. for: C<sub>19</sub>H<sub>11</sub>N<sub>3</sub> [M+H]<sup>+</sup> 282.1026, found 282.1024.

#### 2,4-Di(naphthalen-1-yl)pyridine (**2j**)

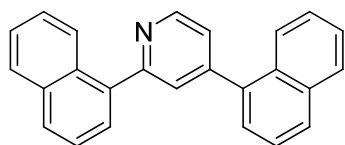

The reaction was conducted with 1-(naphthalen-1-yl)ethanone (**1j**, 68.1 mg, 0.4 mmol). The residue was purified by column chromatography (silica gel, petroleum ether/dichloromethane = 3:1) to give **2j** as a yellow solid; yield 38%; mp 112-114 °C.

<sup>1</sup>H NMR (400 MHz, CDCl<sub>3</sub>, ppm) δ 8.92 (d, *J* = 4.8 Hz, 1H), 8.26 (d, *J* = 2.4 Hz, 1H), 8.01-7.92 (m, 5H), 7.77 (s, 1H), 7.70 (d, *J* = 6.8 Hz, 1H), 7.71-7.51 (m, 8H); <sup>13</sup>C NMR (100 MHz, CDCl<sub>3</sub>, ppm) 159.3, 149.5, 149.2, 138.3, 137.4, 134.0, 133.8, 131.2, 130.8, 129.1, 128.9, 128.5, 128.4, 127.7, 127.0, 126.7, 126.6, 126.3, 126.2, 125.9, 125.4, 125.3, 125.2, 123.4; MS (EI) *m/z* (%) 330 (100), 204, 176, 164, 151; HRMS calcd. for: C<sub>25</sub>H<sub>18</sub>N [M+H]<sup>+</sup> 332.1434, found 332.1429.

#### 2,4-Bis(4-fluorophenyl)pyridine (**2k**)

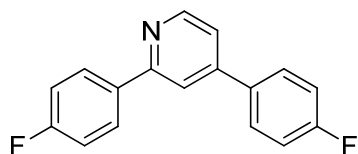

The reaction was conducted with 1-(4-fluorophenyl)ethanone (**1k**, 55.3 mg, 0.4 mmol). The

residue was purified by column chromatography (silica gel, petroleum ether/dichloromethane = 3:1) to give **2k** as orange oil; yield 60%; mp 83-85 °C.

<sup>1</sup>H NMR (400 MHz, CDCl<sub>3</sub>, ppm) δ 8.71 (d, *J* = 4.8 Hz, 1H), 8.05-8.01 (m, 2H), 7.83 (s, 1H), 7.68-7.65 (m, 2H), 7.40 (d, *J* = 4.8 Hz, 1H), 7.22-7.16 (m, 4H); <sup>13</sup>C NMR (100 MHz, CDCl<sub>3</sub>, ppm) δ 163.7 (d, *J* = 247.2 Hz), 163.5 (d, *J* = 247.9 Hz), 157.2, 150.2, 148.4, 135.6 (d, *J* = 3.1 Hz), 134.6 (d, *J* = 3.4 Hz), 128.9 (d, *J* = 1.3 Hz), 128.8 (d, *J* = 1.3 Hz), 120.0, 118.2, 116.2 (d, *J* = 21.6 Hz), 115.6 (d, *J* = 21.5 Hz); MS (EI) *m/z* (%) 267 (100), 238, 172, 120, 75; HRMS calcd. for: C<sub>17</sub>H<sub>11</sub>F<sub>2</sub>N [M+H]<sup>+</sup> 268.0932, found 268.0933.

#### 2,4-Bis(4-chlorophenyl)pyridine (**2l**)<sup>[1]</sup>

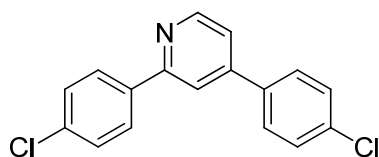

The reaction was conducted with 1-(4-chlorophenyl)ethanone (**1l**, 61.8 mg, 0.4 mmol). The residue was purified by column chromatography (silica gel, petroleum ether/dichloromethane = 3:1) to give **2l** as red-brown solid; yield 65%; mp 103-105 °C.

<sup>1</sup>H NMR (400 MHz, CDCl<sub>3</sub>, ppm) δ 8.73 (d, *J* = 4.8 Hz, 1H), 7.99 (d, *J* = 8.0 Hz, 2H), 7.85 (s, 1H), 7.62 (d, *J* = 8.4 Hz, 2H), 7.50-7.41 (m, 5H); <sup>13</sup>C NMR (100 MHz, CDCl<sub>3</sub>, ppm) δ 156.9, 150.2, 148.1, 137.6, 136.7, 135.4, 135.3, 129.3, 128.9, 128.3, 128.2, 120.1, 118.1; MS (EI) *m/z* (%) 299 (100), 264, 202, 114, 75.

#### 2,4-Bis(4-bromophenyl)pyridine (**2m**)<sup>[1]</sup>

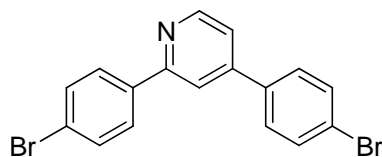

The reaction was conducted with 1-(4-bromophenyl)ethanone (**1m**, 79.6 mg, 0.4 mmol). The residue was purified by column chromatography (silica gel, petroleum ether/dichloromethane = 3:1) to give **2m** as orange solid; yield 64%; mp 136-138 °C.

<sup>1</sup>H NMR (400 MHz, CDCl<sub>3</sub>, ppm) δ 8.73 (d, *J* = 5.2 Hz, 1H), 7.93 (d, *J* = 8.4 Hz, 2H), 8.51 (s, 1H), 7.66-7.62 (m, 4H), 7.55 (d, *J* = 8.0 Hz, 2H), 7.43 (d, *J* = 4.8 Hz, 1H); <sup>13</sup>C NMR (100 MHz,

CDCl<sub>3</sub>, ppm)  $\delta$  157.0, 150.3, 148.2, 138.1, 137.2, 132.3, 131.9, 128.6, 128.5, 123.6, 123.6, 120.2, 118.1; MS (EI) m/z (%) 389 (100), 310, 228, 114, 75.

#### 2,4-Bis(3-chlorophenyl)pyridine (**2n**)

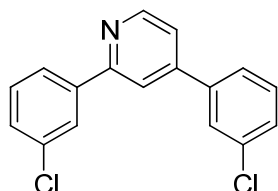

The reaction was conducted with 1-(3-chlorophenyl)ethanone (**1n**, 61.8 mg, 0.4 mmol). The residue was purified by column chromatography (silica gel, petroleum ether/dichloromethane = 3:1) to give **2n** as red-brown solid; yield 66%; mp 95-97 °C.

<sup>1</sup>H NMR (400 MHz, CDCl<sub>3</sub>, ppm)  $\delta$  8.75 (d,  $J$  = 4.8 Hz, 1H), 8.06 (s, 1H), 7.94-7.92 (dd,  $J$  = 3.6 Hz, 2.4Hz, 1H), 7.86 (s, 1H), 7.67 (s, 1H), 7.57-7.55 (dd,  $J$  = 2.8 Hz, 4.0 Hz, 1H), 7.45-7.42 (m, 5H); <sup>13</sup>C NMR (100 MHz, CDCl<sub>3</sub>, ppm)  $\delta$  156.7, 150.2, 148.0, 140.9, 140.1, 135.1, 134.9, 130.4, 130.0, 129.1, 127.2, 127.2, 125.2, 125.0, 120.6, 118.6, 118.5; MS (EI) m/z (%) 299 (100), 264, 202, 114, 75; HRMS calcd. for: C<sub>17</sub>H<sub>11</sub>Cl<sub>2</sub>N [M+H]<sup>+</sup> 300.0341, found 300.0342.

#### 2,4-Bis(3-bromophenyl)pyridine (**2o**)<sup>[1]</sup>

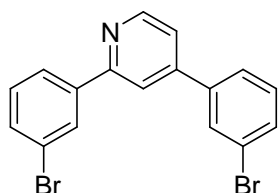

The reaction was conducted with 1-(3-chlorophenyl)ethanone (**1o**, 79.6 mg, 0.4 mmol). The residue was purified by column chromatography (silica gel, petroleum ether/dichloromethane = 3:1) to give **2o** as red-brown solid; yield 66%; mp 89-91 °C.

<sup>1</sup>H NMR (400 MHz, CDCl<sub>3</sub>, ppm)  $\delta$  8.76 (d,  $J$  = 4.4 Hz, 1H), 8.22 (s, 1H), 7.98 (d,  $J$  = 7.6 Hz, 1H), 7.84 (d,  $J$  = 10.0 Hz, 2H), 7.62-7.57 (m, 3H), 7.45-7.36 (m, 3H); <sup>13</sup>C NMR (100 MHz, CDCl<sub>3</sub>, ppm)  $\delta$  155.8, 150.5, 147.2, 138.8, 138.0, 133.6, 133.7, 131.2, 130.7, 128.9, 128.9, 127.2, 126.2, 126.0, 120.6, 118.1, 109.9; MS (EI) m/z (%) 389 (100), 310, 228, 114, 75.

#### 2,4-Bis(2-chlorophenyl)pyridine (**2p**)



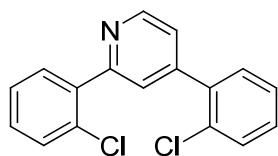

The reaction was conducted with 1-(2-chlorophenyl)ethanone (**1p**, 61.8 mg, 0.4 mmol). The residue was purified by column chromatography (silica gel, petroleum ether/dichloromethane = 3:1) to give **2p** as red-brown oil; yield 38%.

$^1\text{H}$  NMR (400 MHz,  $\text{CDCl}_3$ , ppm)  $\delta$  8.78 (d,  $J = 4.8$  Hz, 1H), 7.76 (s, 1H), 7.68-7.66 (m, 1H), 7.53-7.48 (m, 2H), 7.40-7.33 (m, 6H);  $^{13}\text{C}$  NMR (100 MHz,  $\text{CDCl}_3$ , ppm)  $\delta$  156.8, 149.34, 146.9, 139.1, 135.4, 132.3, 131.7, 131.0, 130.3, 130.1, 129.8, 129.7, 129.3, 127.2, 127.0, 125.5, 123.0; MS (EI)  $m/z$  (%) 299 (100), 264, 202, 114, 75; HRMS calcd. for:  $\text{C}_{17}\text{H}_{11}\text{Cl}_2\text{N}$   $[\text{M}+\text{H}]^+$  300.0341, found 300.0342.

#### 2,4-Bis(2,5-dichlorophenyl)pyridine (**2q**)

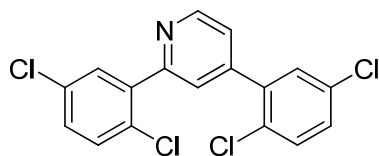

The reaction was conducted with 1-(2,4-dichlorophenyl)ethanone (**1q**, 75.6 mg, 0.4 mmol). The residue was purified by column chromatography (silica gel, petroleum ether/dichloromethane = 3:1) to give **2q** as red-brown solid; yield 40%; mp 161-163 °C.

$^1\text{H}$  NMR (400 MHz,  $\text{CDCl}_3$ , ppm)  $\delta$  8.80 (d,  $J = 4.8$  Hz, 1H), 7.73 (s, 1H), 7.681 (d,  $J = 2.4$  Hz, 1H), 7.47-7.32 (m, 6H);  $^{13}\text{C}$  NMR (100 MHz,  $\text{CDCl}_3$ , ppm)  $\delta$  155.7, 149.7, 146.0, 140.1, 139.0, 133.1, 133.1, 131.6, 131.4, 131.3, 130.7, 130.6, 130.5, 129.9, 129.8, 125.1, 123.1; MS (EI)  $m/z$  (%) 299 (100), 264, 202, 114, 75; HRMS calcd. for:  $\text{C}_{17}\text{H}_9\text{Cl}_4\text{N}$   $[\text{M}+\text{H}]^+$  367.9562, found 367.9562.

#### 2,4-Bis(3,4-dichlorophenyl)pyridine (**2r**)

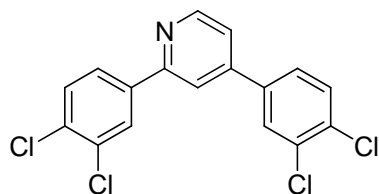

The reaction was conducted with 1-(3-chlorophenyl)ethanone (**1r**, 75.6 mg, 0.4 mmol). The residue was purified by column chromatography (silica gel, petroleum ether/dichloromethane =

3:1) to give **2r** as red-brown solid; yield 70%; mp 130-133 °C.

<sup>1</sup>H NMR (400 MHz, CDCl<sub>3</sub>, ppm) δ 8.76 (d, *J* = 4.8 Hz, 1H), 8.184 (s, 1H), 7.896 (d, *J* = 8.0 Hz, 1H), 7.83 (s, 1H), 7.77 (s, 1H), 7.61-7.51 (m, 3H), 7.44 (d, *J* = 4.8 Hz, 1H); <sup>13</sup>C NMR (100 MHz, CDCl<sub>3</sub>, ppm) δ 156.6, 150.3, 148.0, 141.2, 140.3, 132.1, 132.1, 130.7, 130.3, 130.1, 130.1, 125.7, 125.5, 123.3, 123.1, 120.7, 118.6; MS (EI) *m/z* (%) 369, 334 (100), 261, 148, 75; HRMS calcd. for: C<sub>17</sub>H<sub>9</sub>Cl<sub>4</sub>N [M+H]<sup>+</sup> 367.9562, found 367.9558.

#### 2,4-Diphenyl-6-D-pyridine (2s)

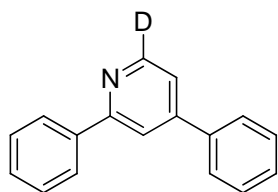

<sup>1</sup>H NMR (400 MHz, CDCl<sub>3</sub>, ppm) δ 8.05 (d, *J* = 7.6 Hz, 2H), 7.94 (s, 1H), 7.71 (d, *J* = 7.2 Hz, 2H), 7.54-7.46 (m, 7H).

#### 2-Methyl-4,6-diphenylpyridine (2t)

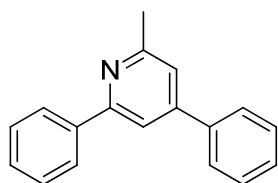

<sup>1</sup>H NMR (400 MHz, CDCl<sub>3</sub>, ppm) δ 8.03 (d, *J* = 7.6 Hz, 2H), 7.72 (s, 1H), 7.68 (d, *J* = 7.2 Hz, 2H), 7.52-7.40 (m, 6H), 7.32 (s, 1H); <sup>13</sup>C NMR (100 MHz, CDCl<sub>3</sub>, ppm) δ 158.8, 157.7, 149.5, 139.8, 138.8, 129.0, 128.8, 128.8, 128.7, 127.1, 127.1, 119.8, 116.1, 24.8; MS (EI) *m/z* (%) 245 (100), 230, 202, 115, 77.

#### 2,4-Diphenyl-<sup>15</sup>N-pyridine (2u)

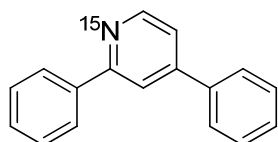

MS (EI) *m/z* (%) 232 (100), 202, 155, 102, 77.

## References

- [1] Liu, J.; Wang, C.-X.; Wu, L. S.; Liang, F.; Huang, G. S. *Synthesis* **2010**, *24*, 4228.

# Copies of $^1\text{H}$ and $^{13}\text{C}$ NMR spectra of products

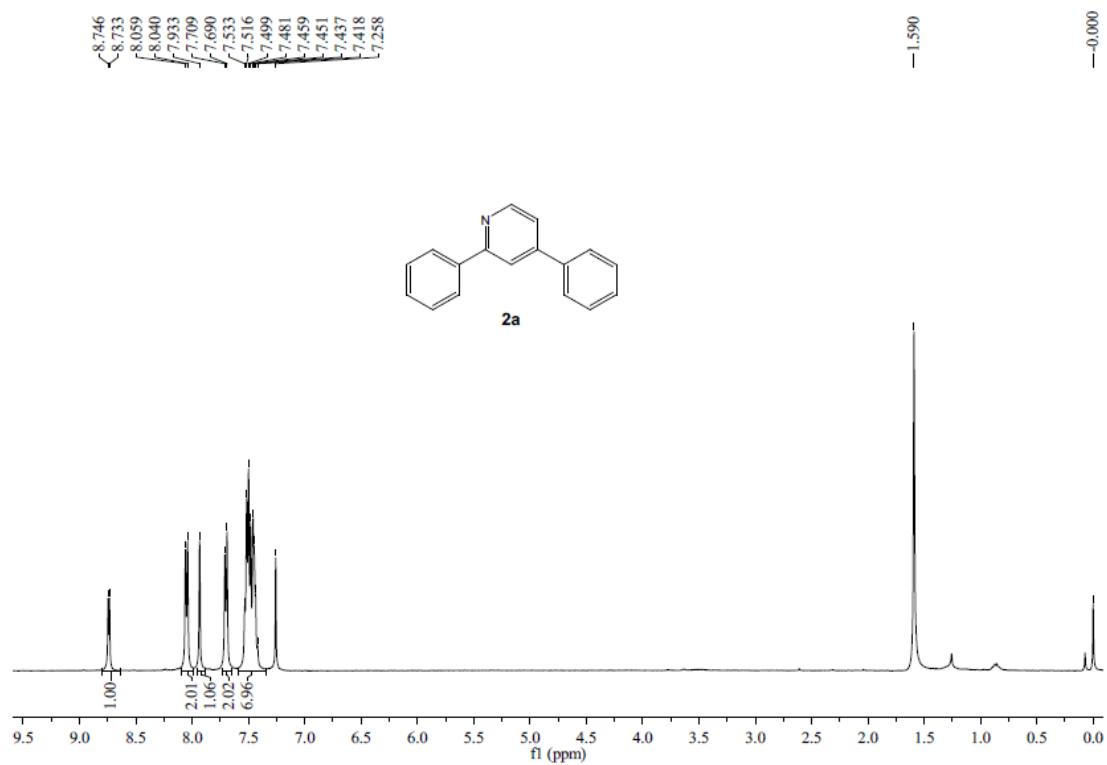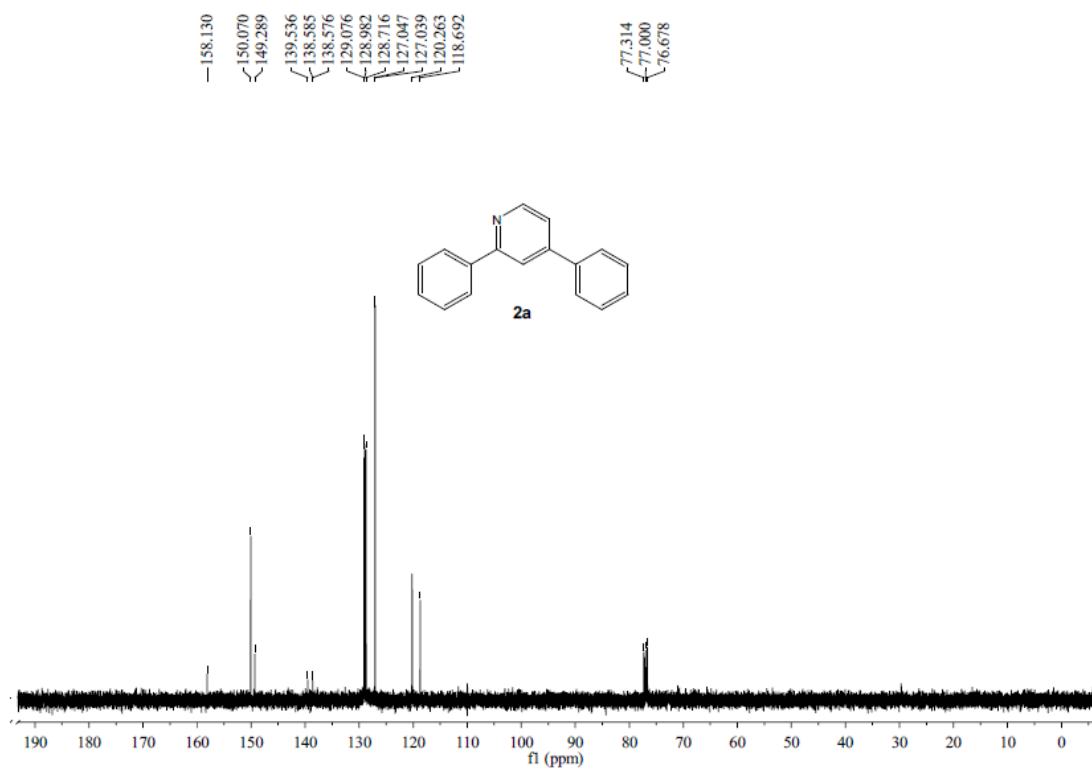

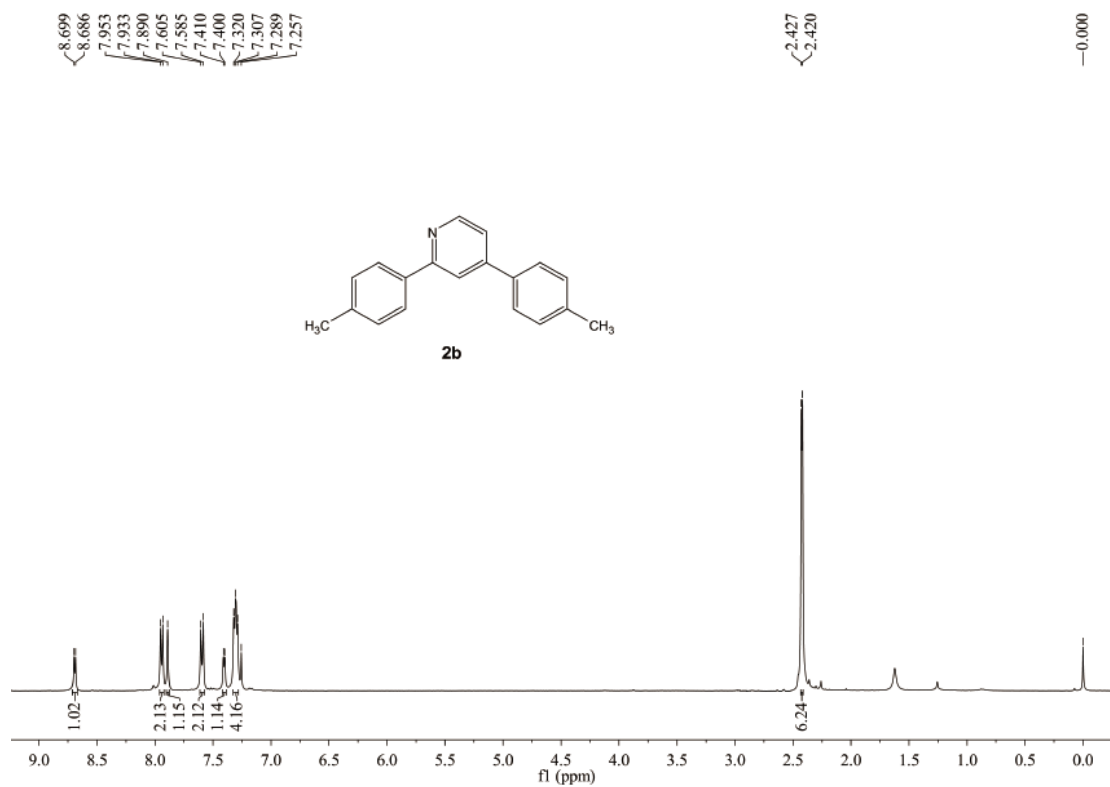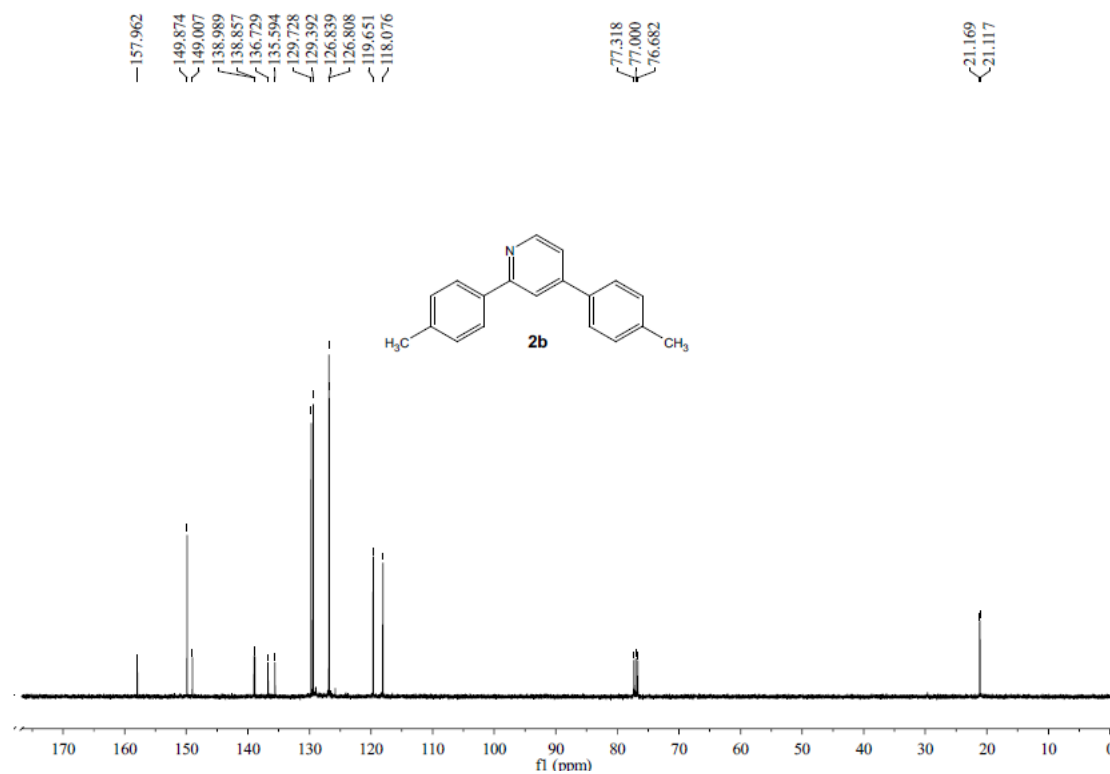

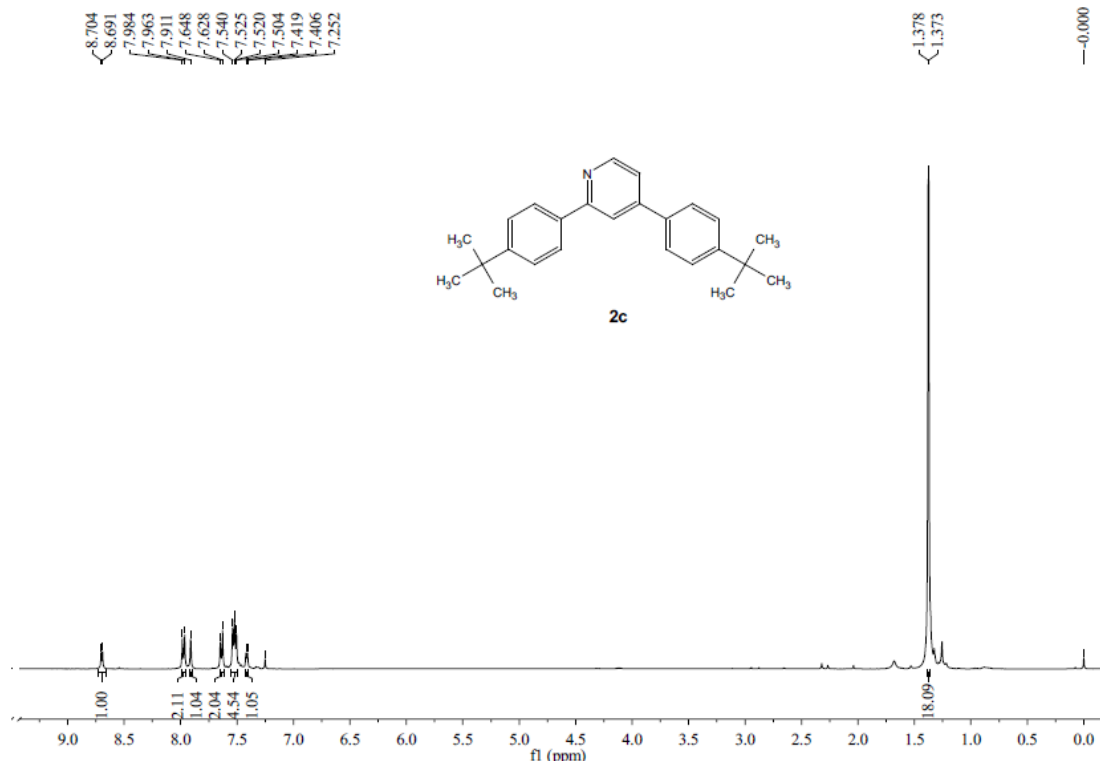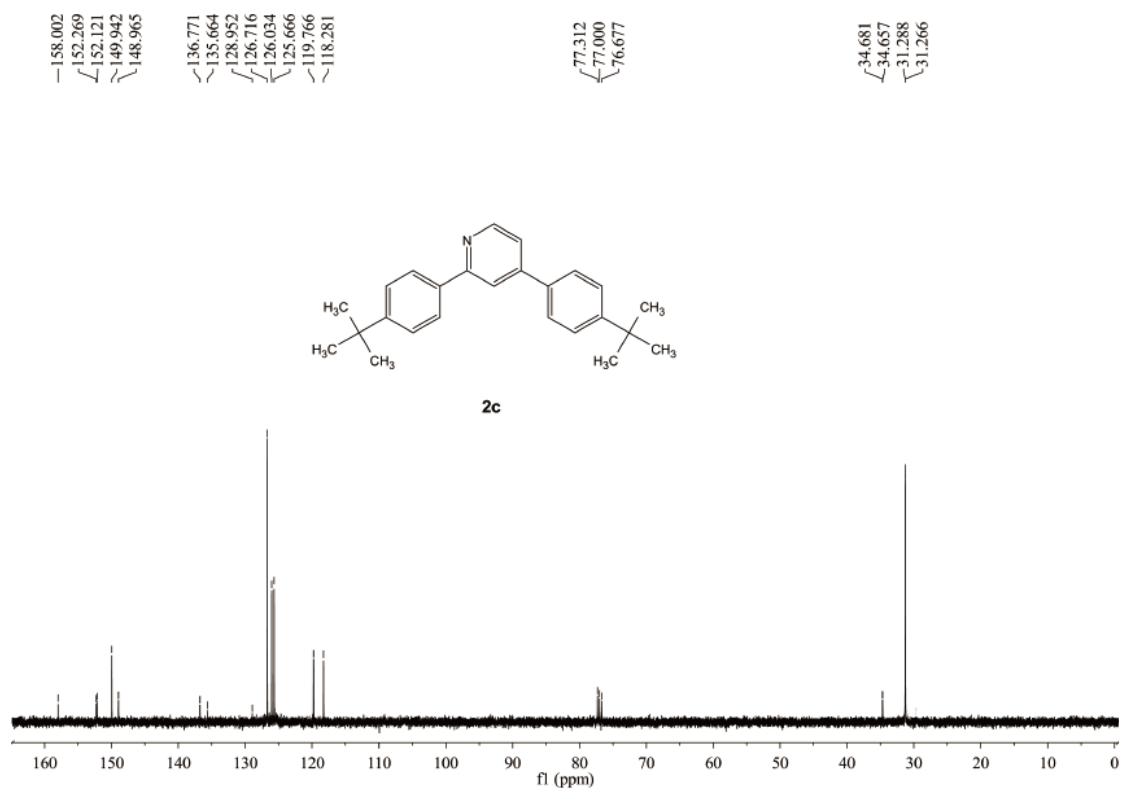

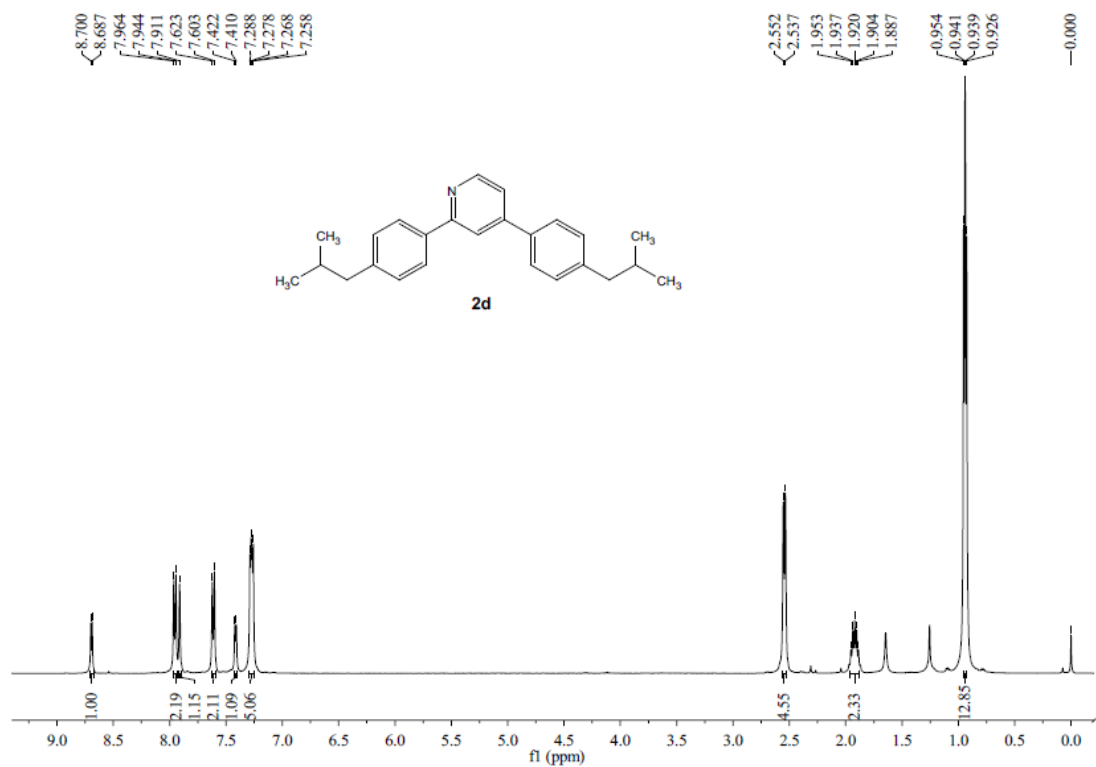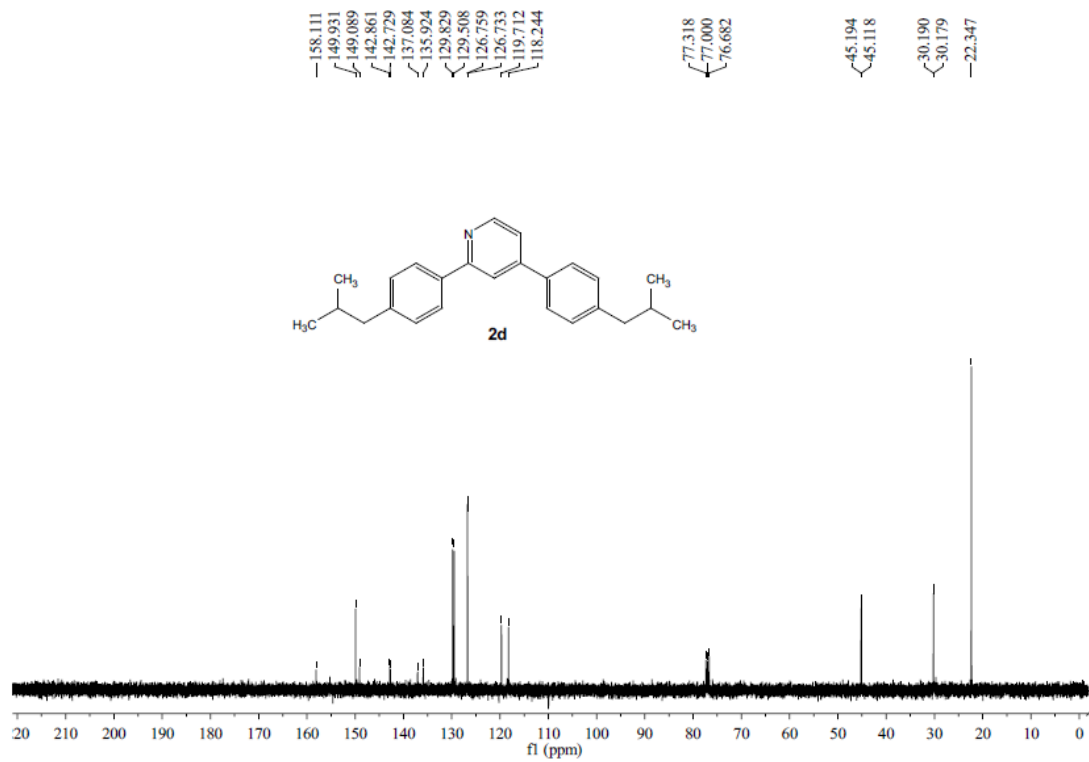

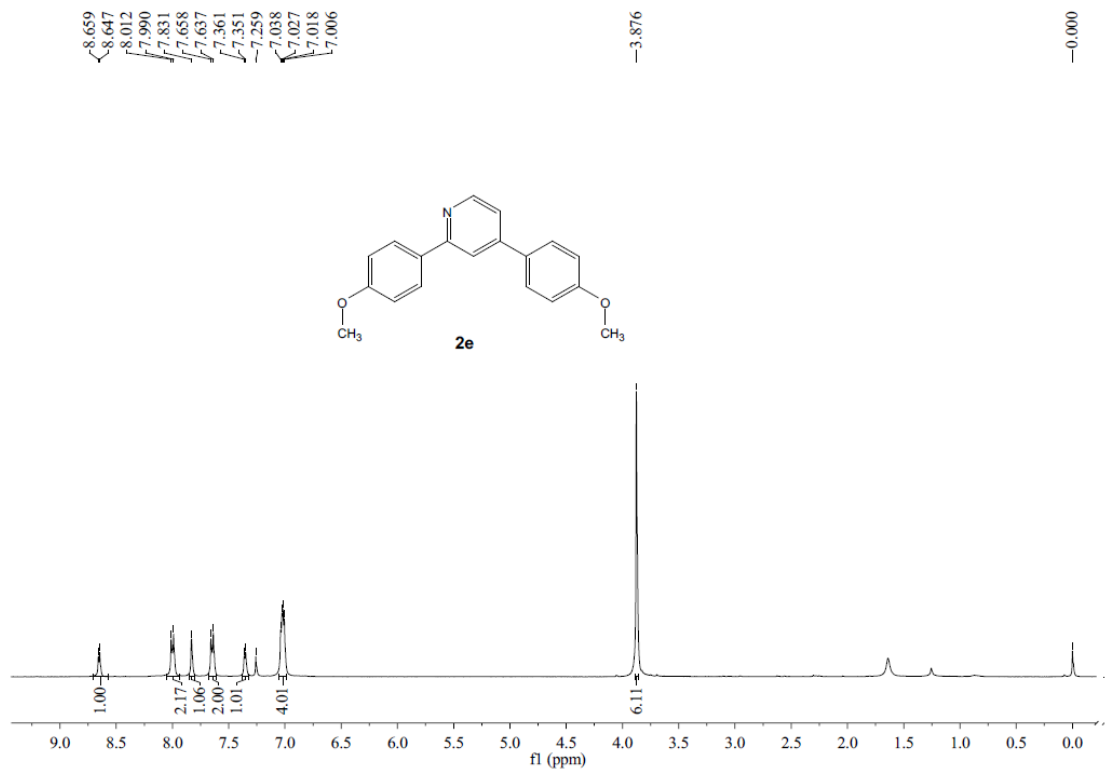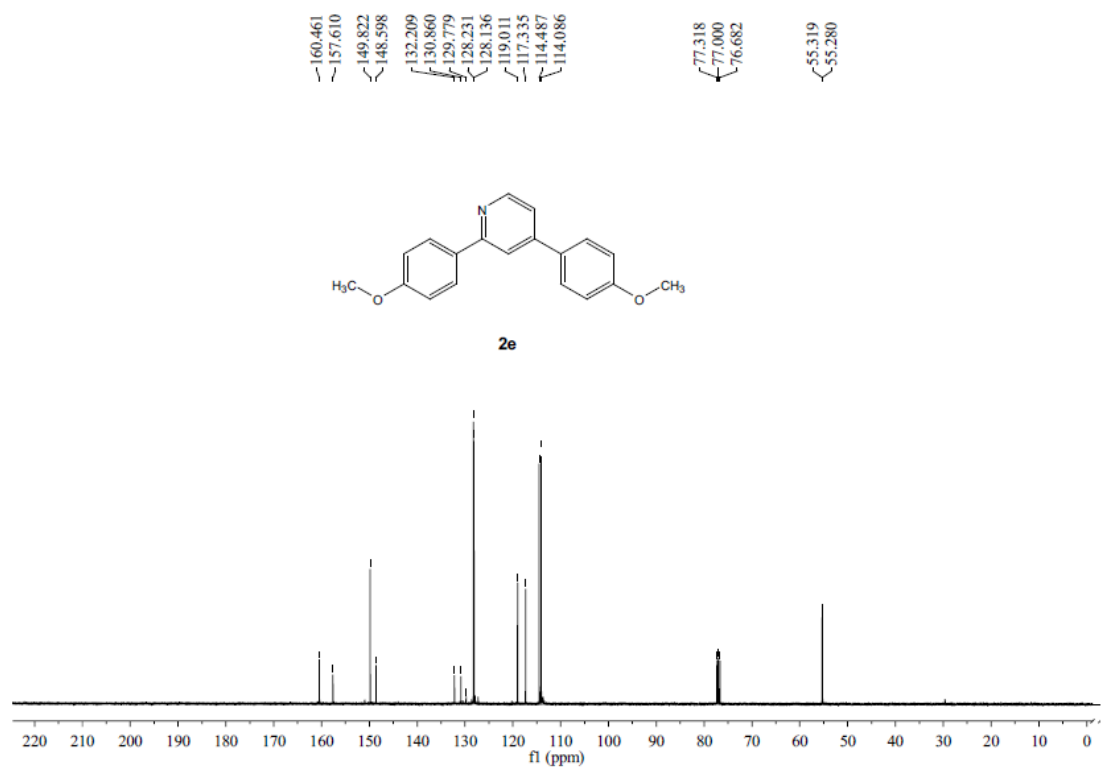



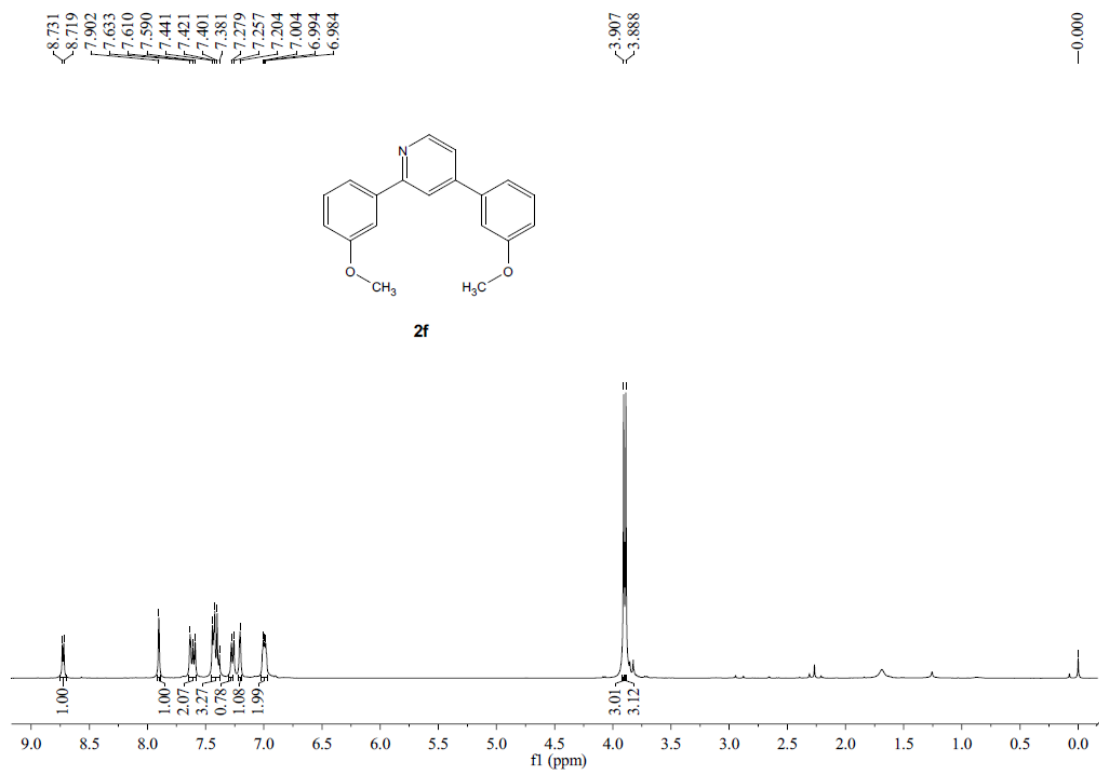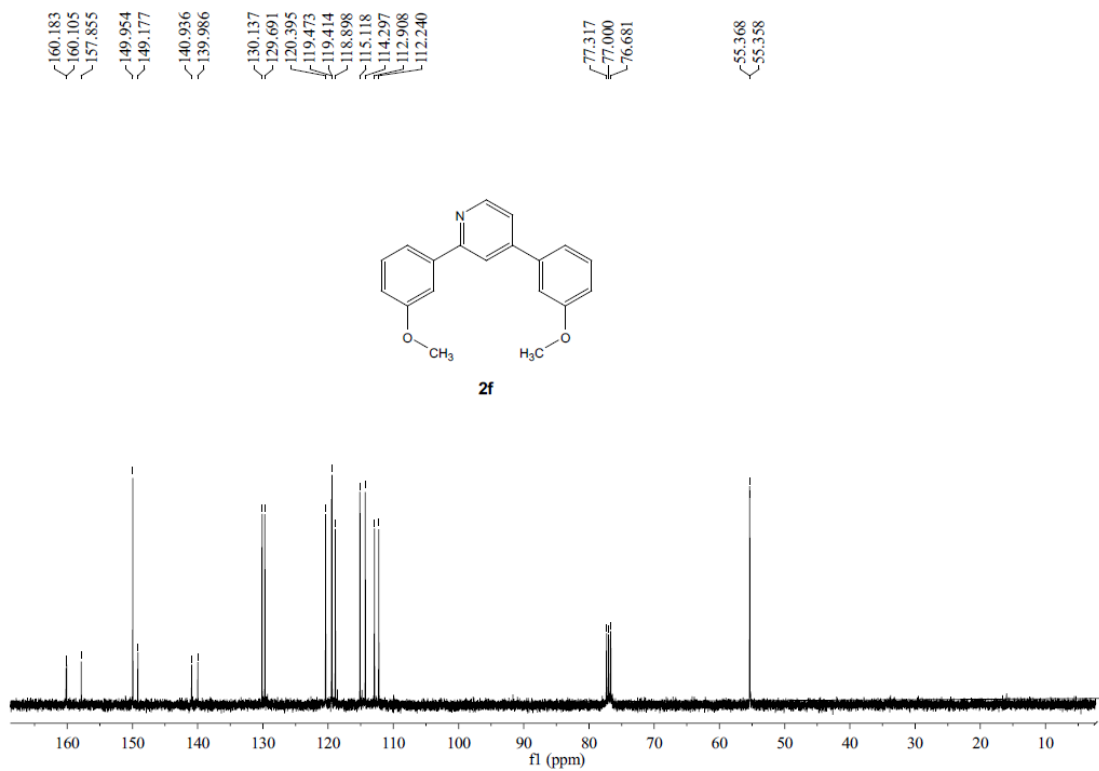

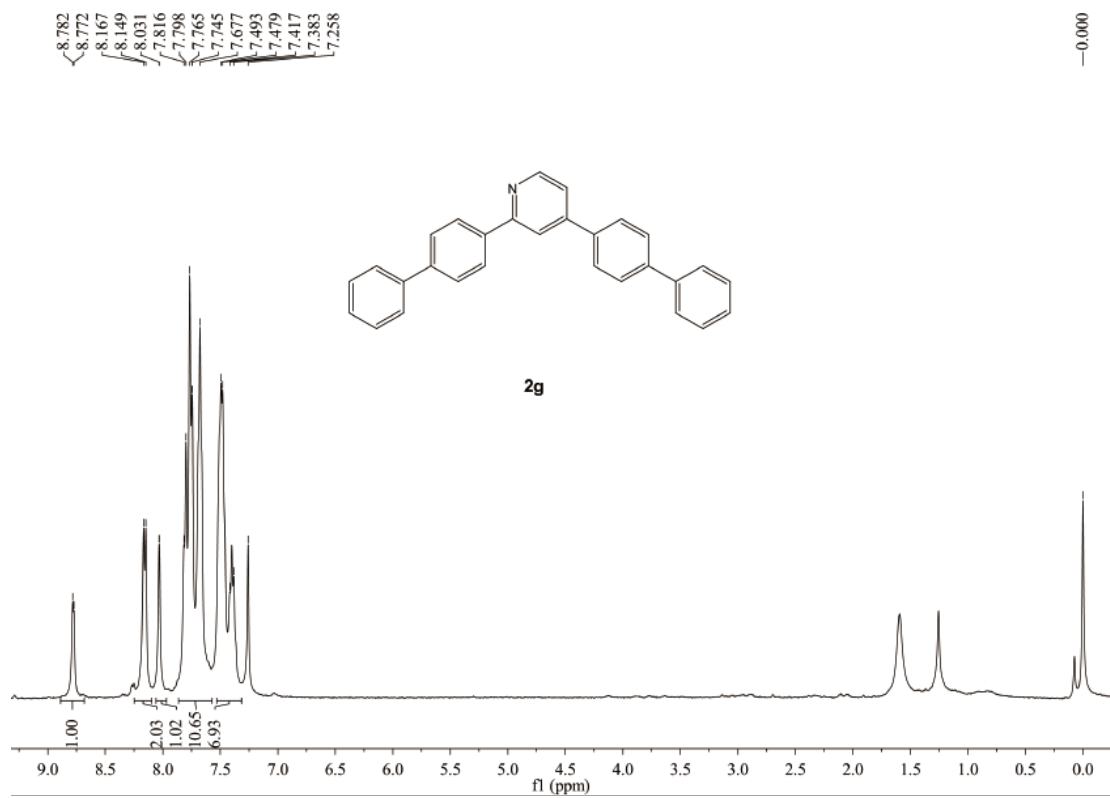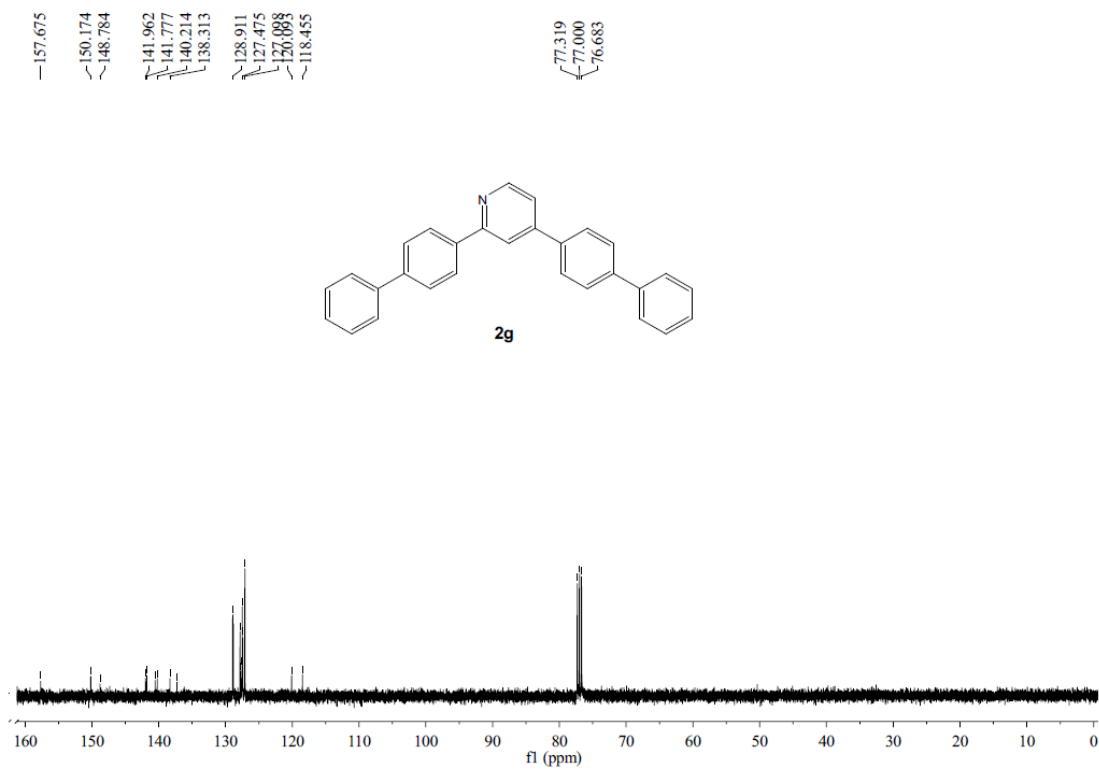

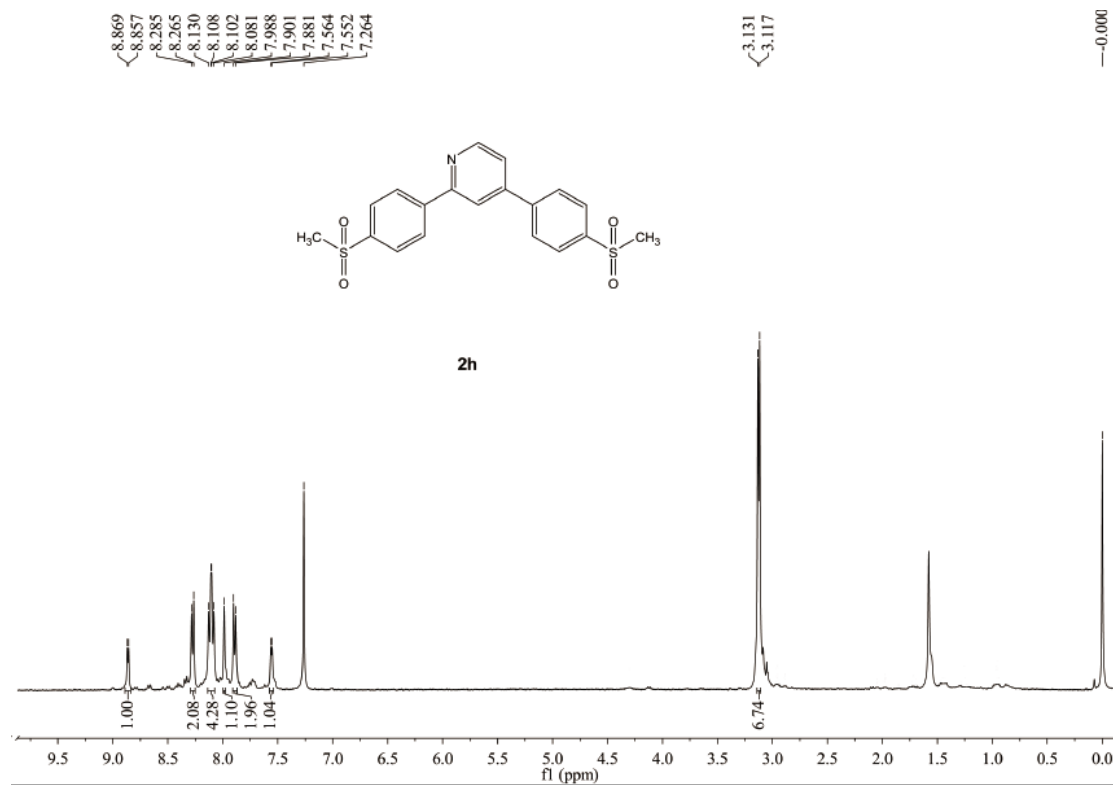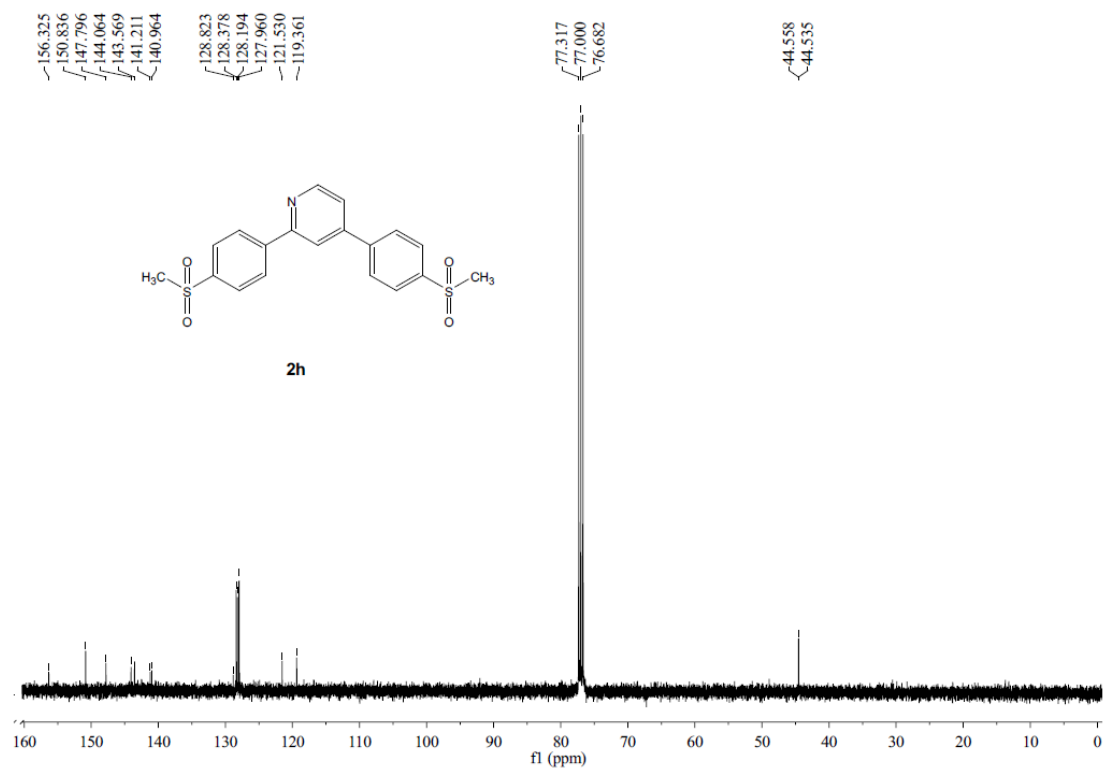

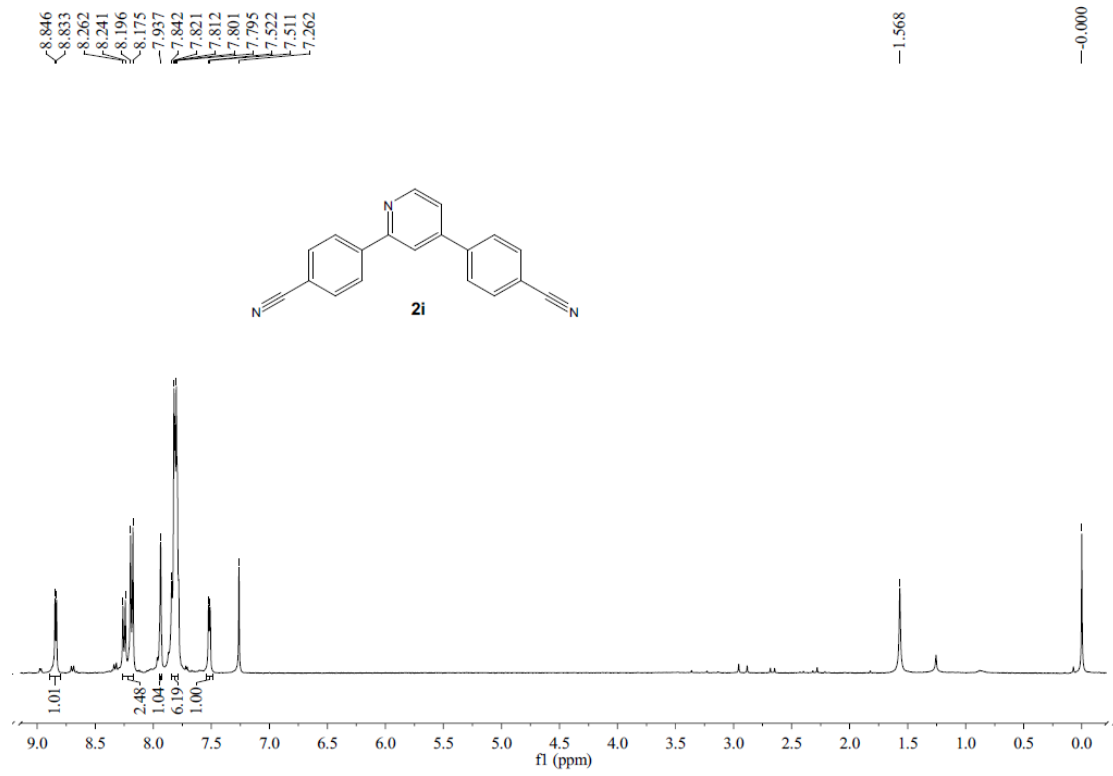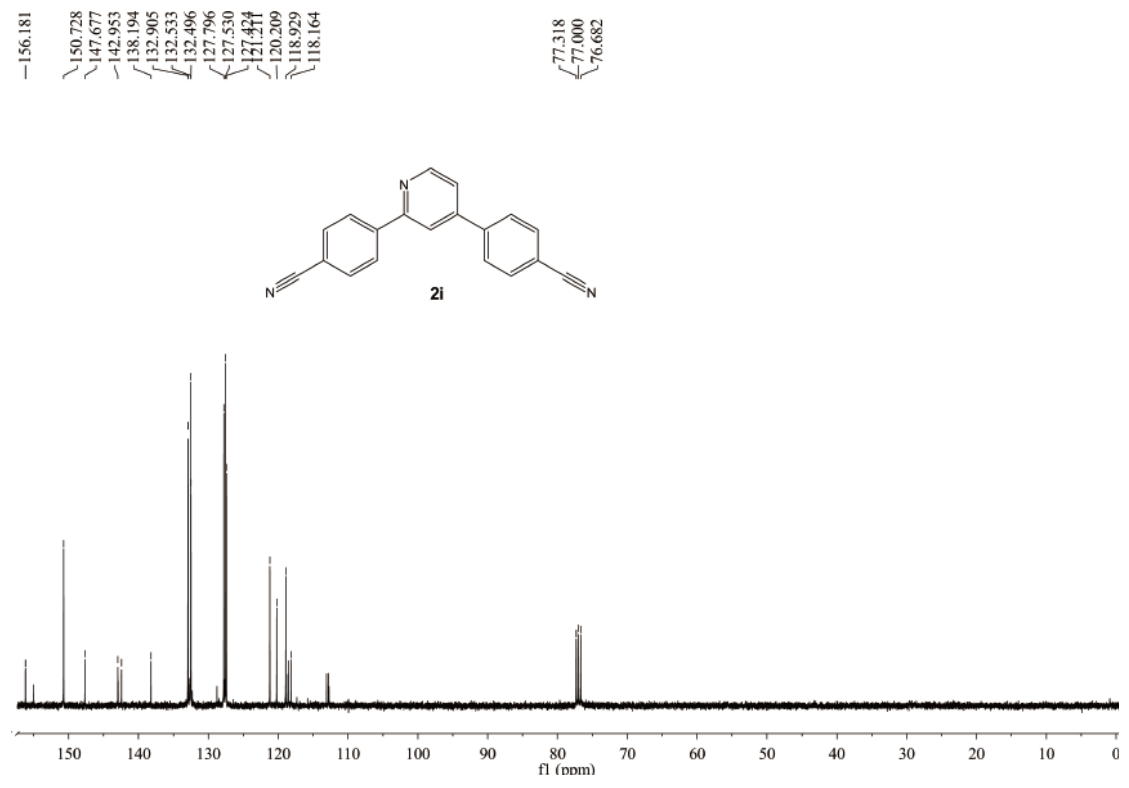

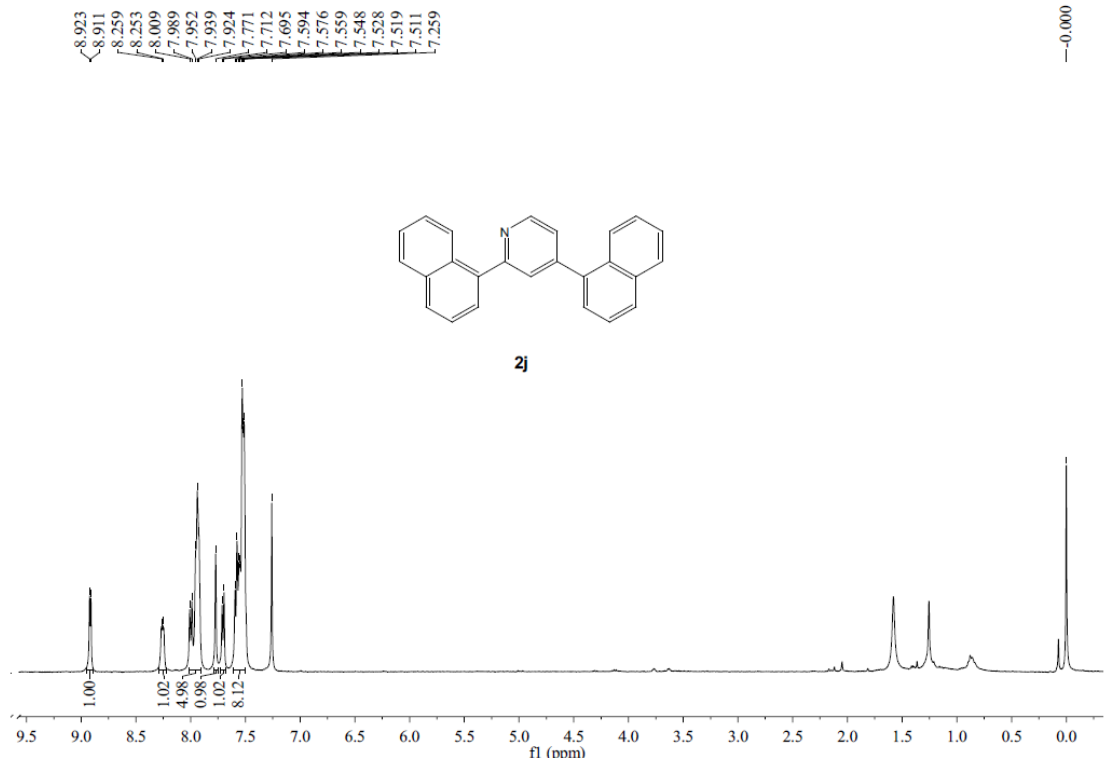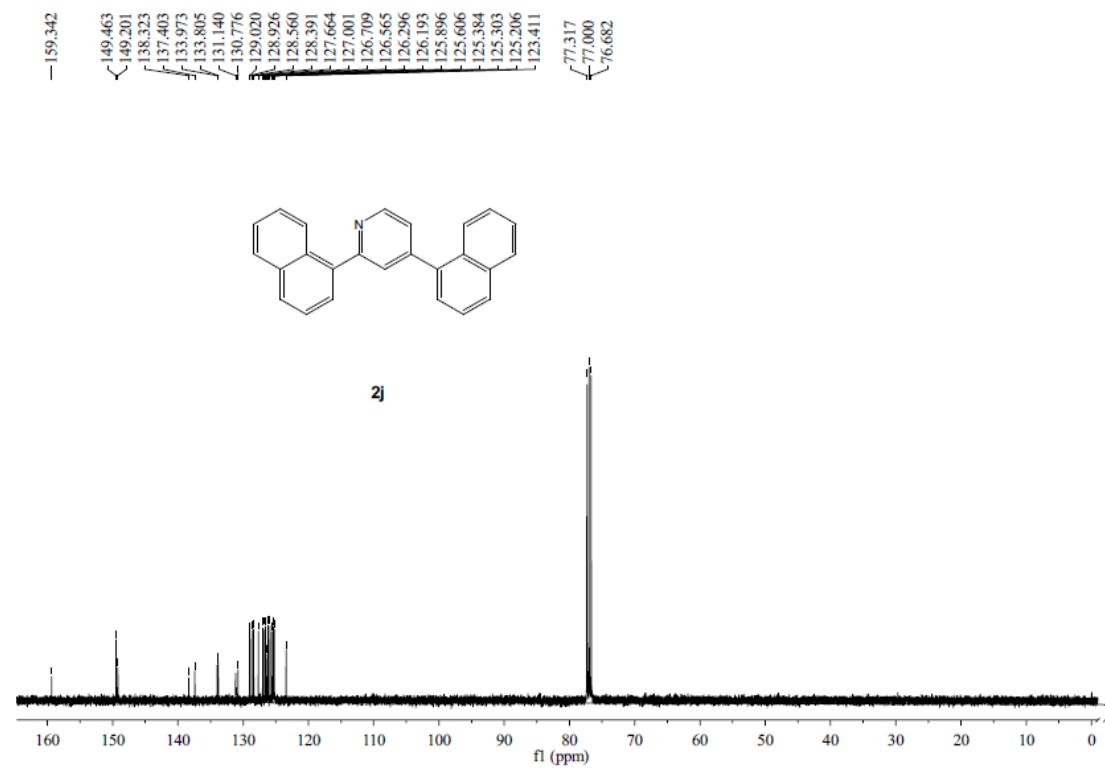

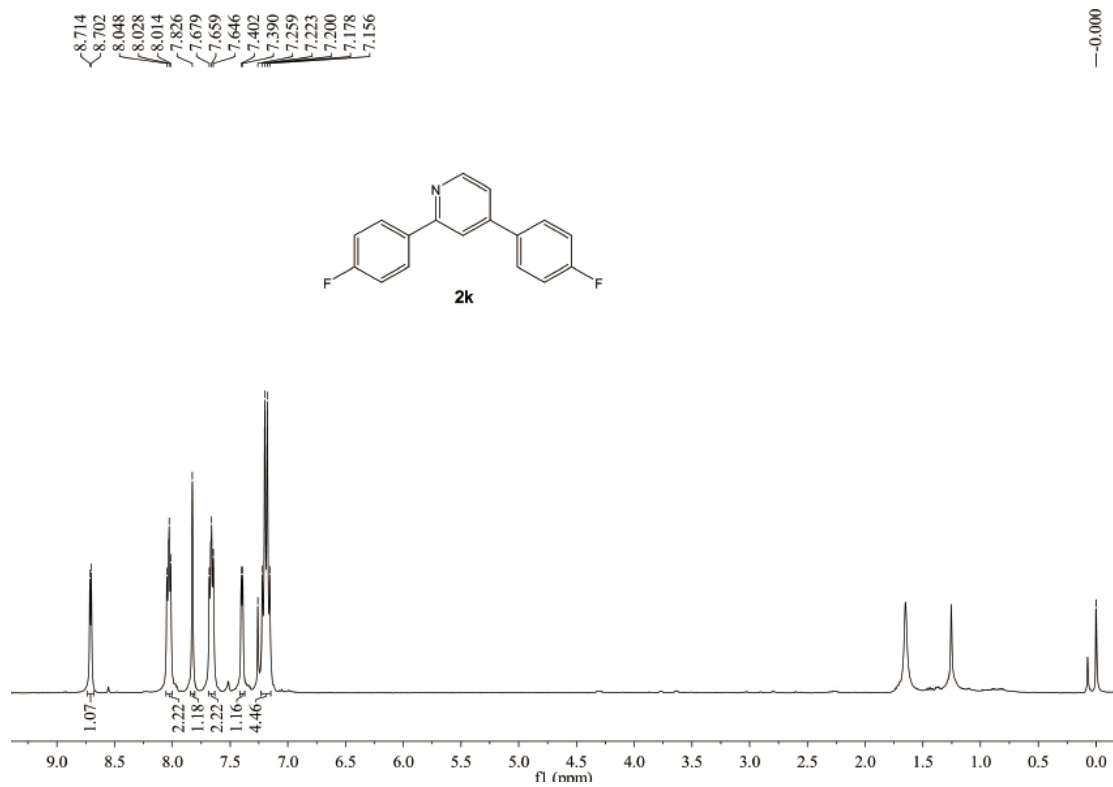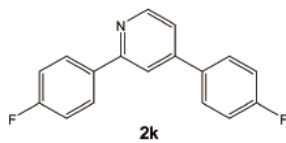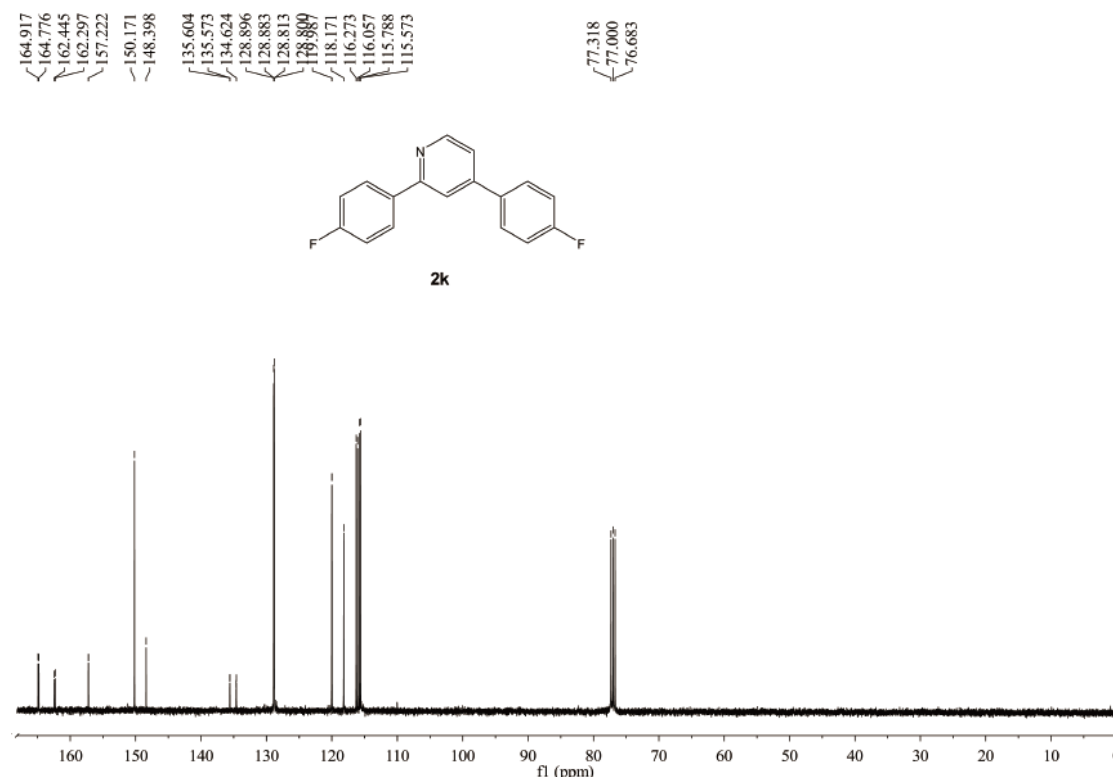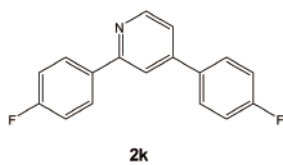

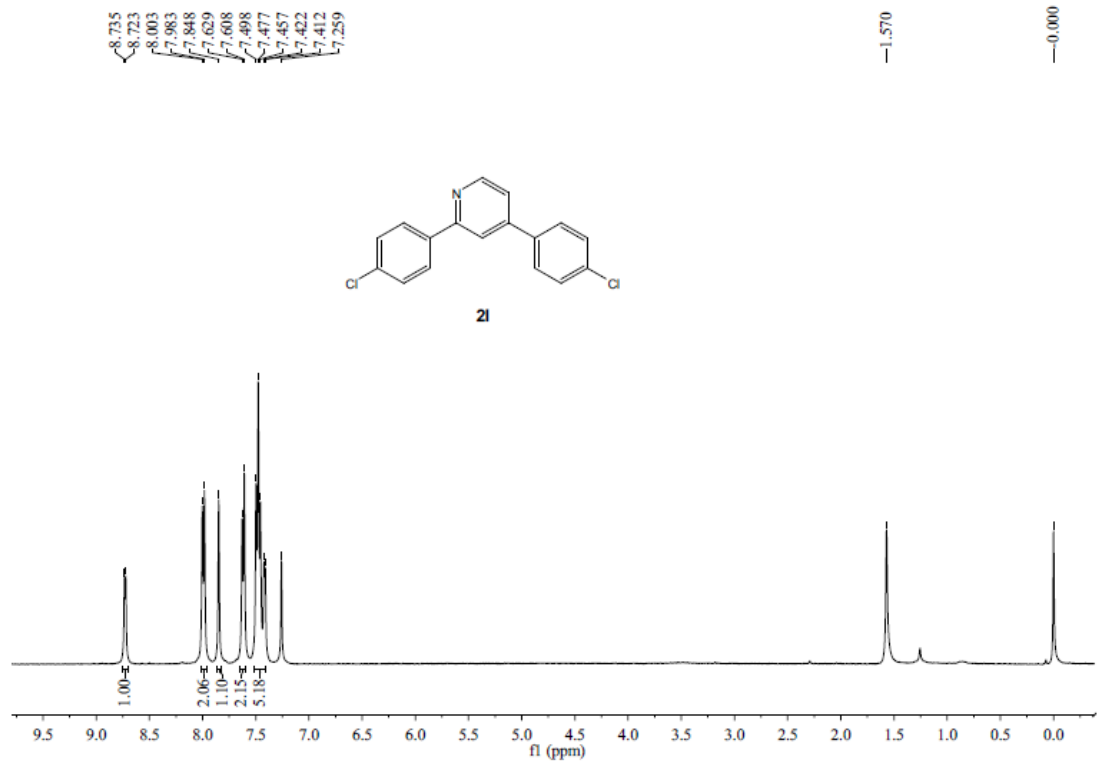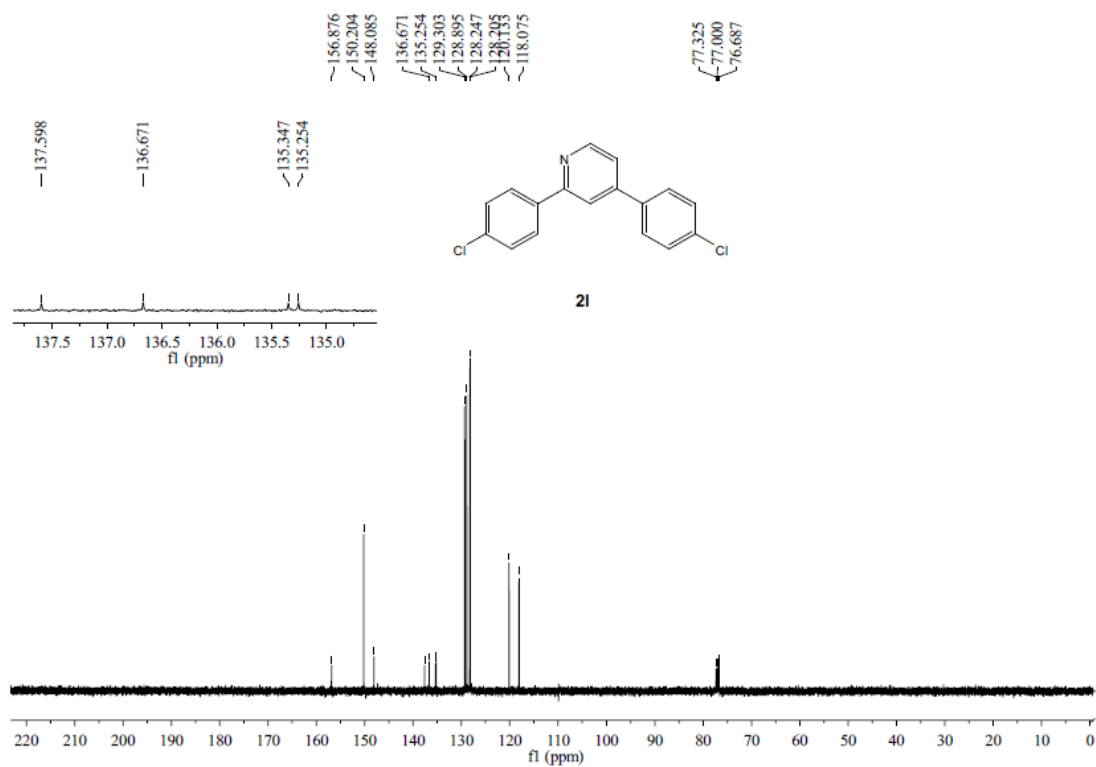

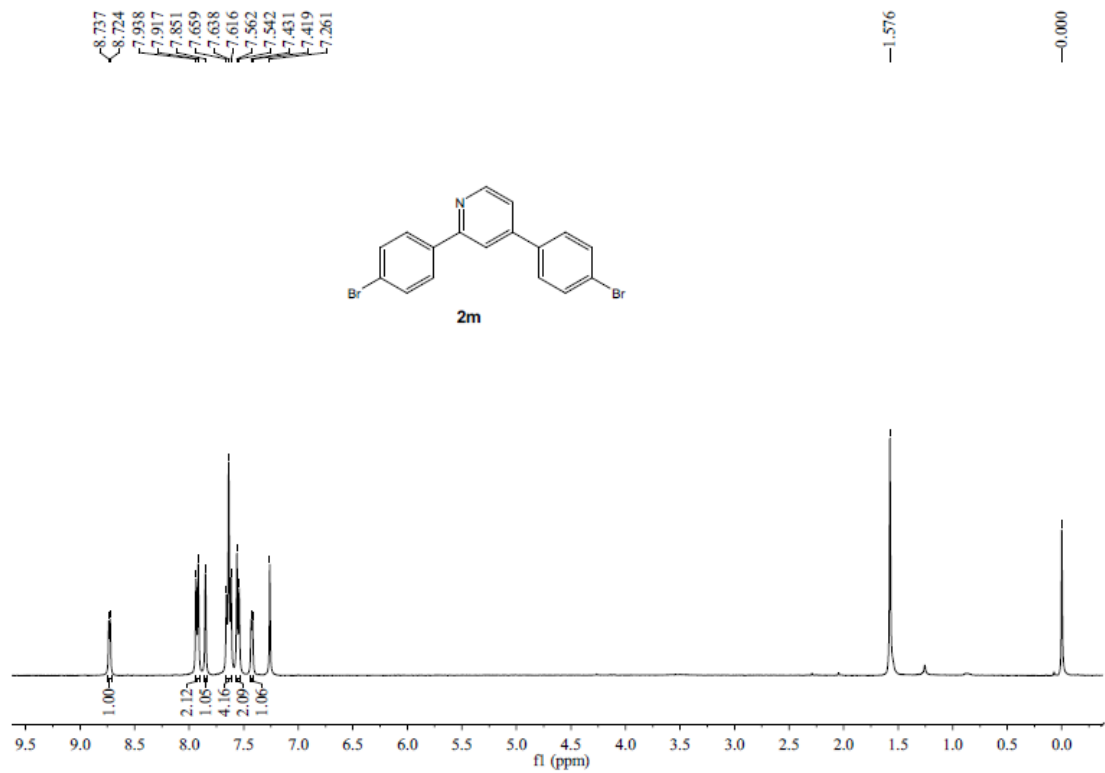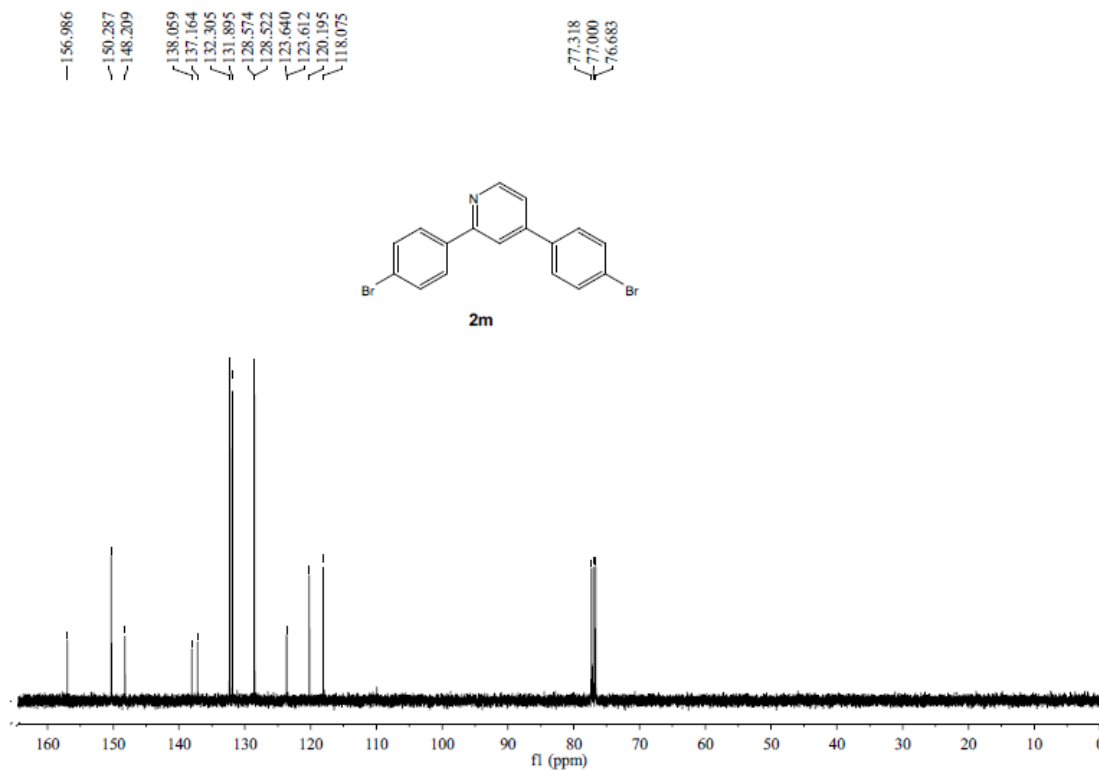



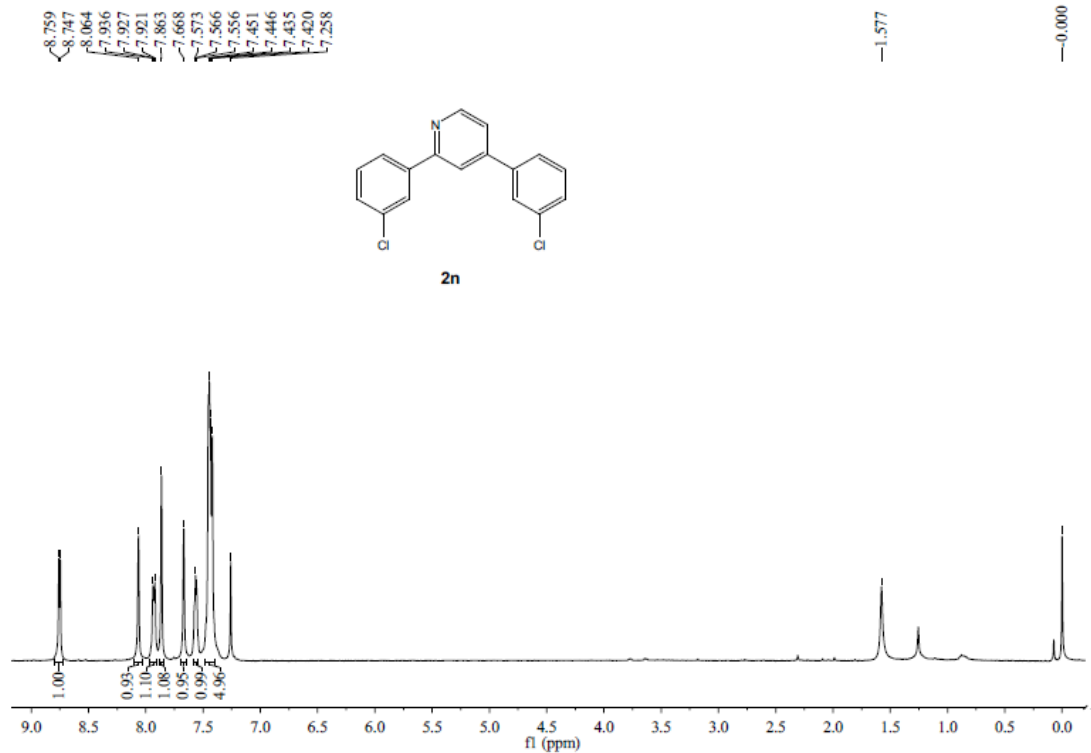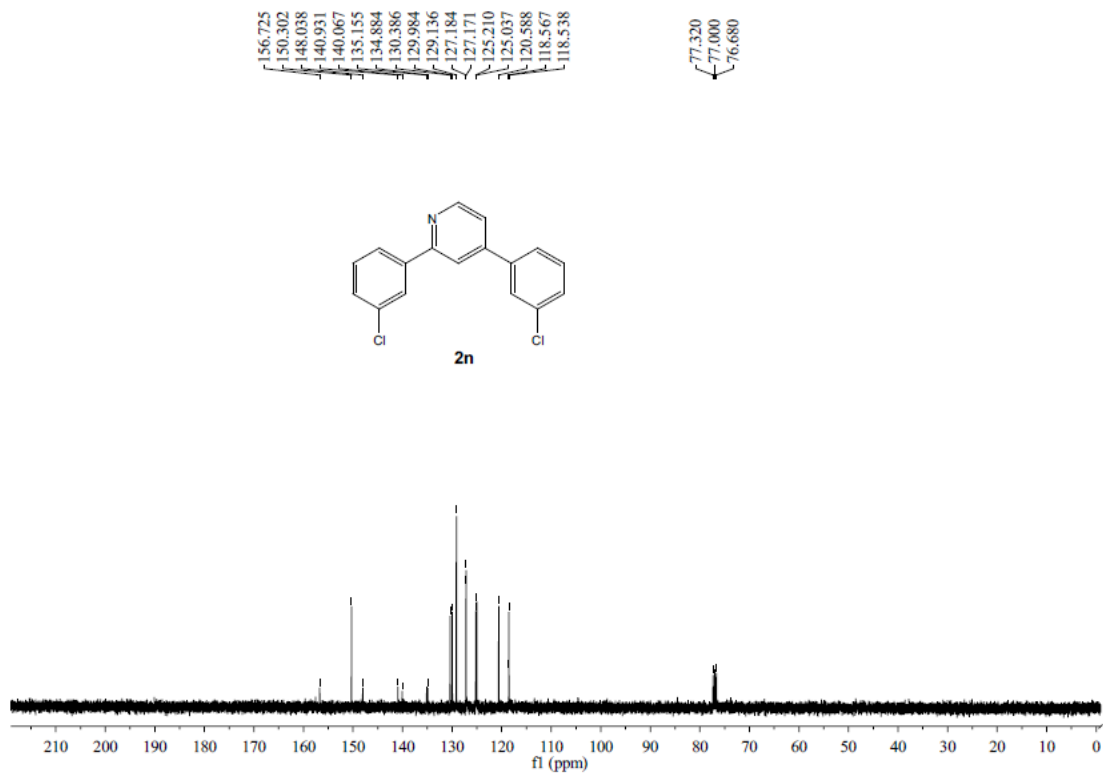

8.760  
8.749  
8.220  
7.985  
7.966  
7.852  
7.827  
7.618  
7.601  
7.565  
7.447  
7.436  
7.415  
7.396  
7.376  
7.356  
7.262

-0.000

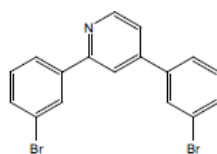

2o

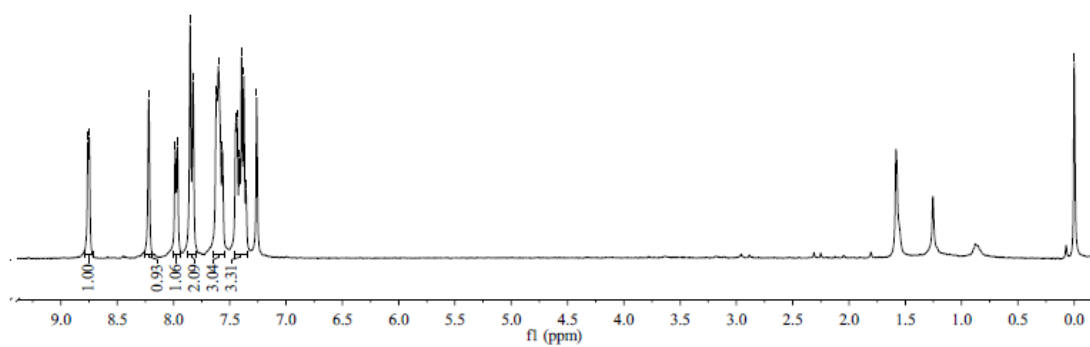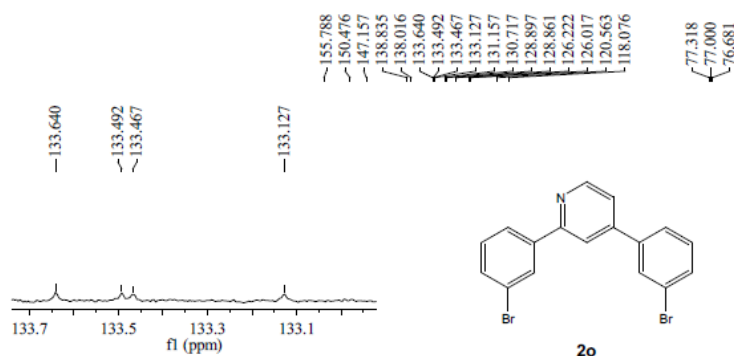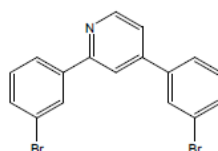

2o

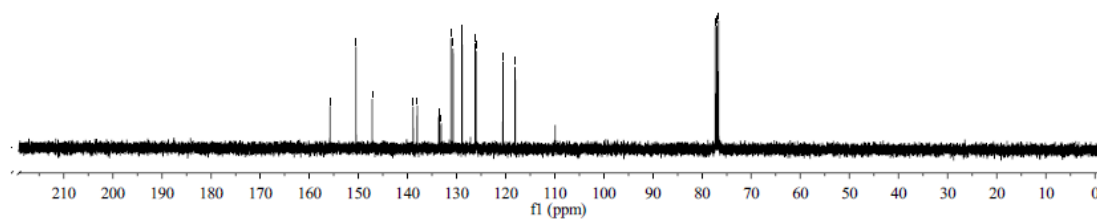

8.790  
8.778  
7.756  
7.678  
7.674  
7.660  
7.656  
7.528  
7.523  
7.516  
7.504  
7.484  
7.481  
7.405  
7.395  
7.390  
7.384  
7.378  
7.366  
7.356  
7.348  
7.343  
7.329  
7.260

-0.000

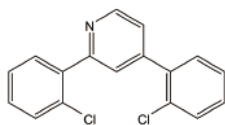

2p

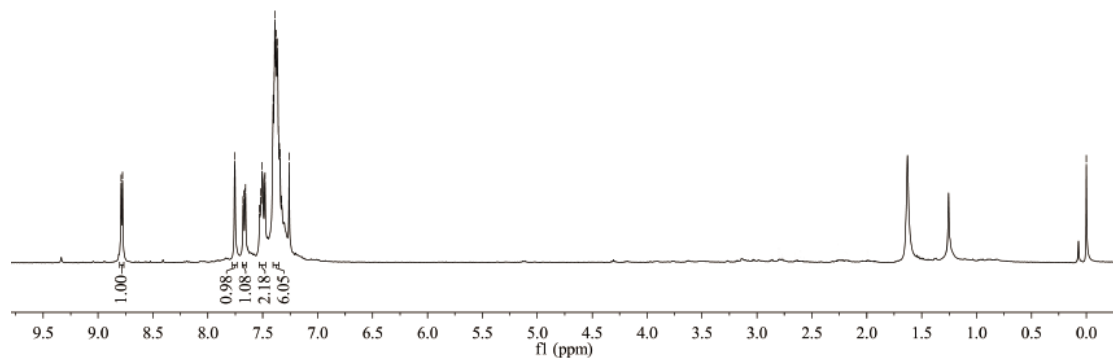

156.820  
149.340  
146.981  
139.069  
135.352  
132.297  
131.666  
131.003  
130.312  
130.150  
129.765  
129.664  
129.256  
127.174  
127.001  
125.487  
122.982

77.320  
77.000  
76.688

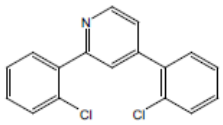

2p

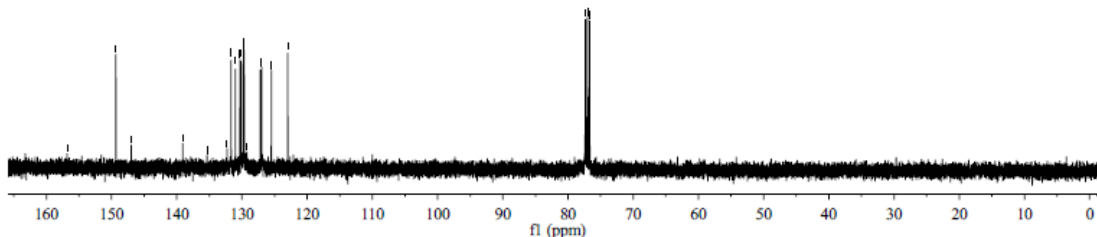

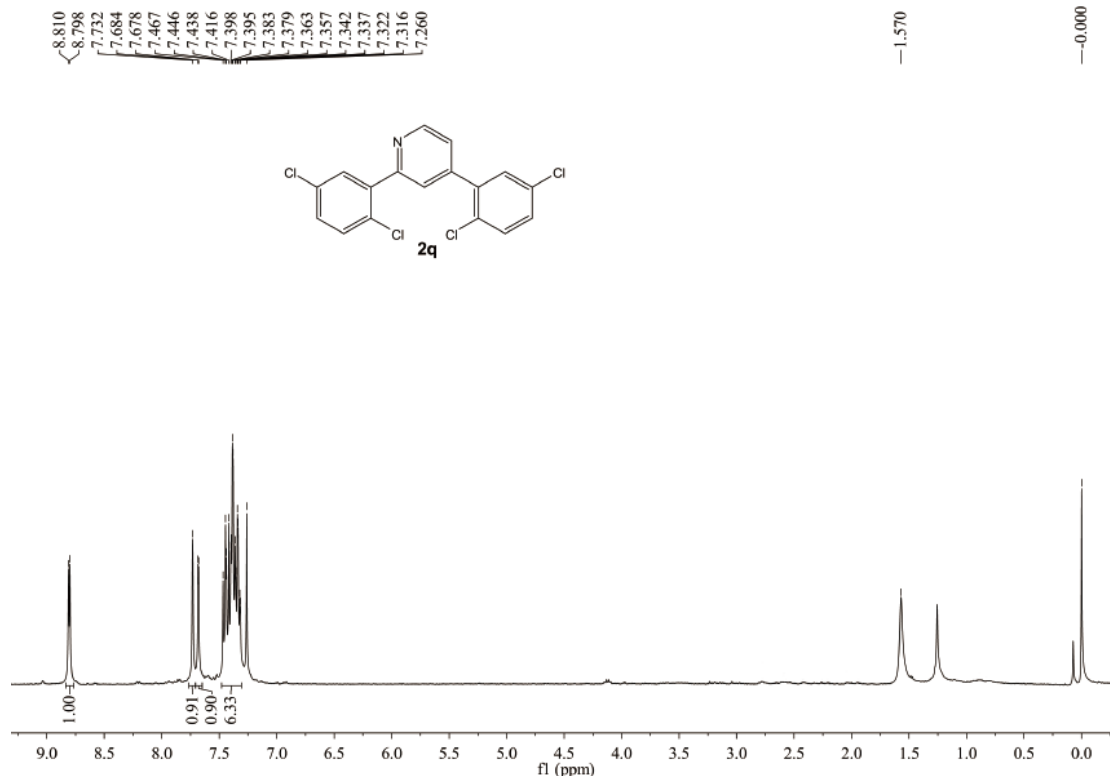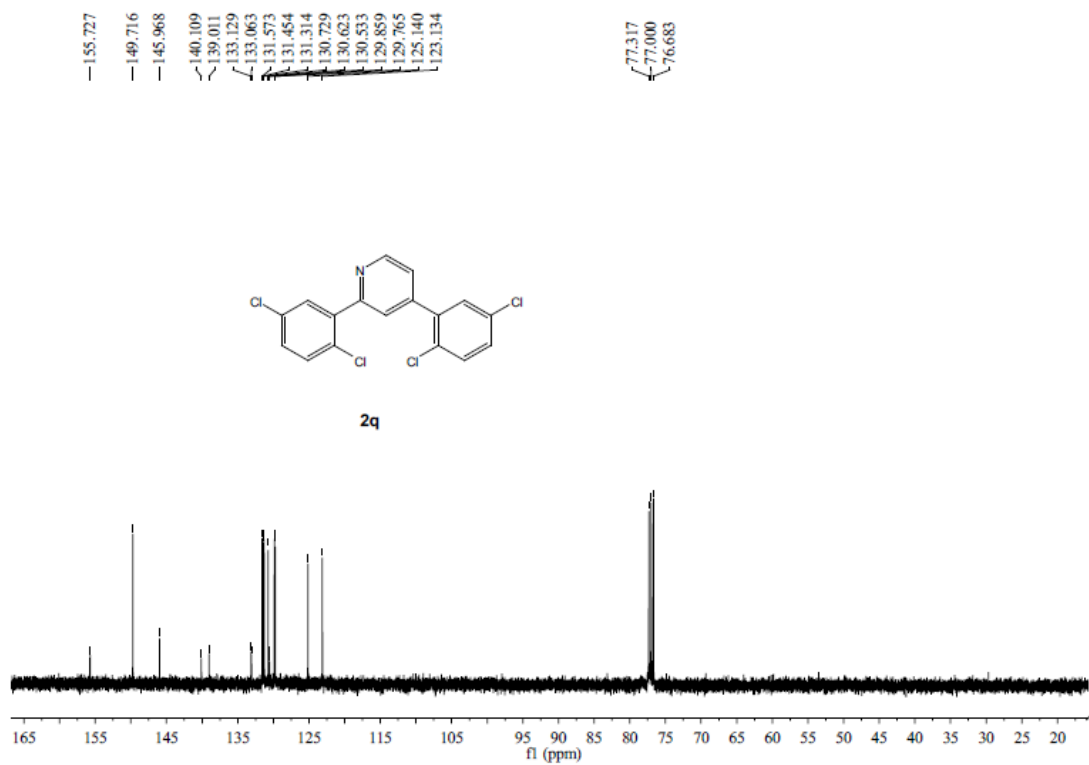

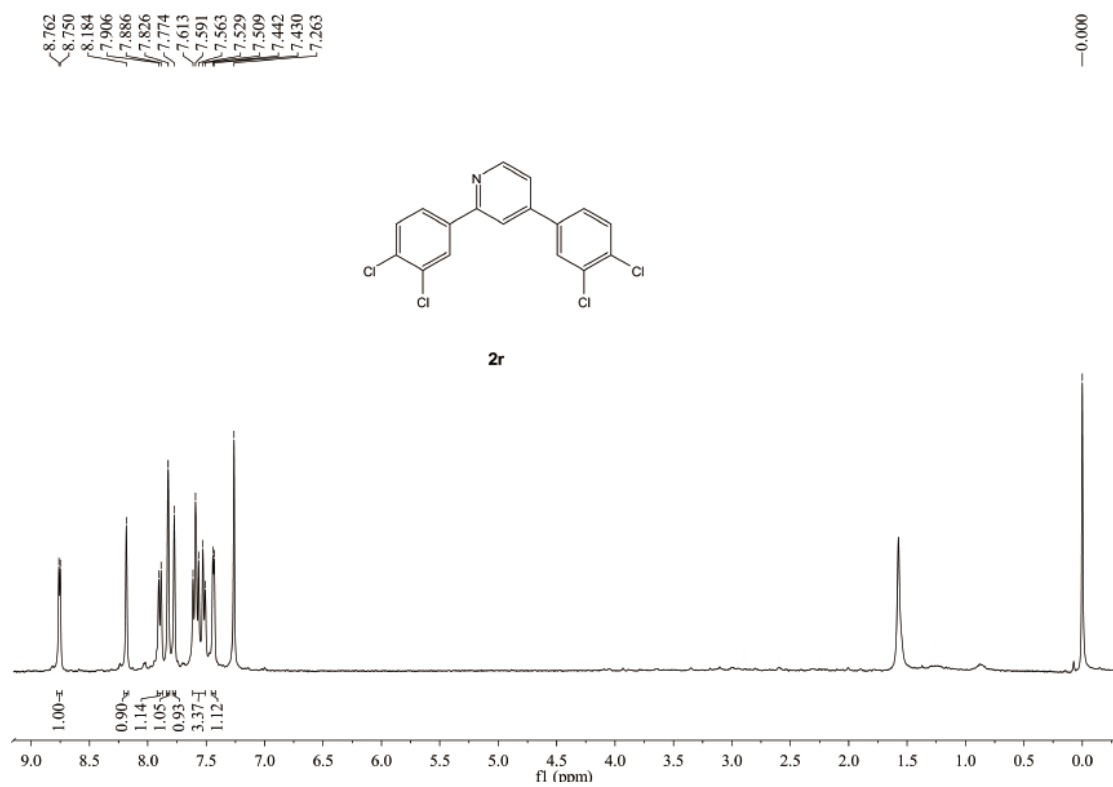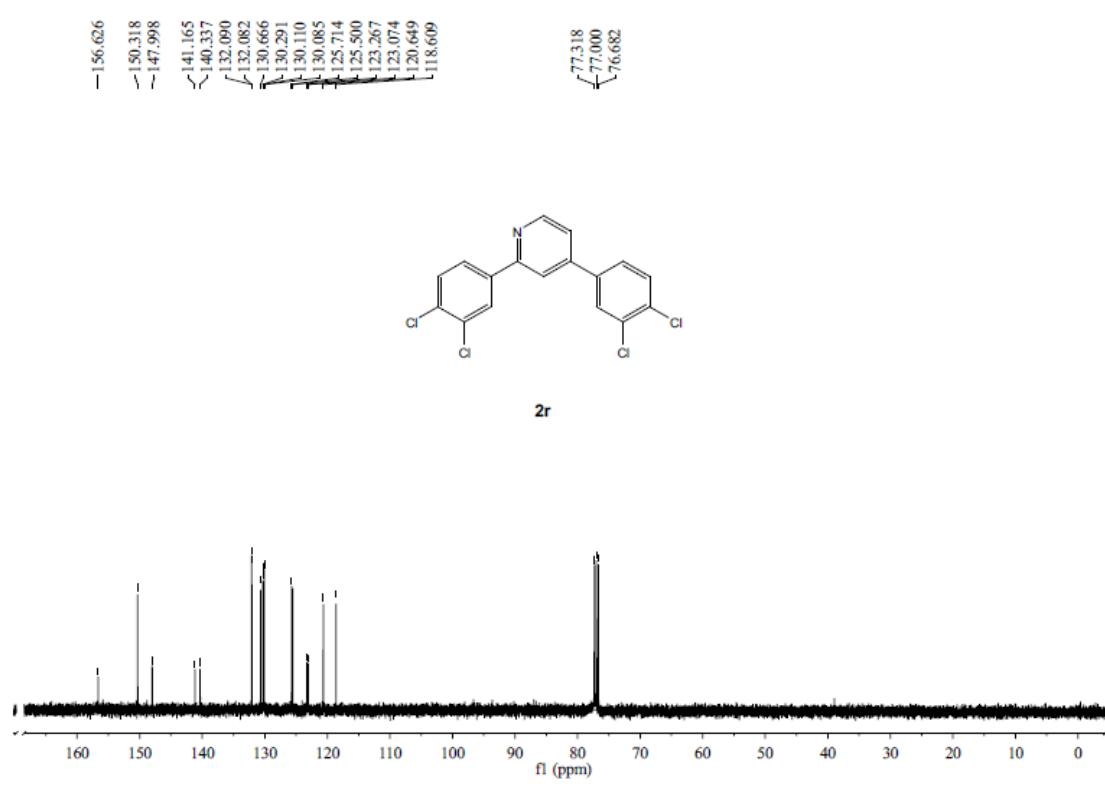

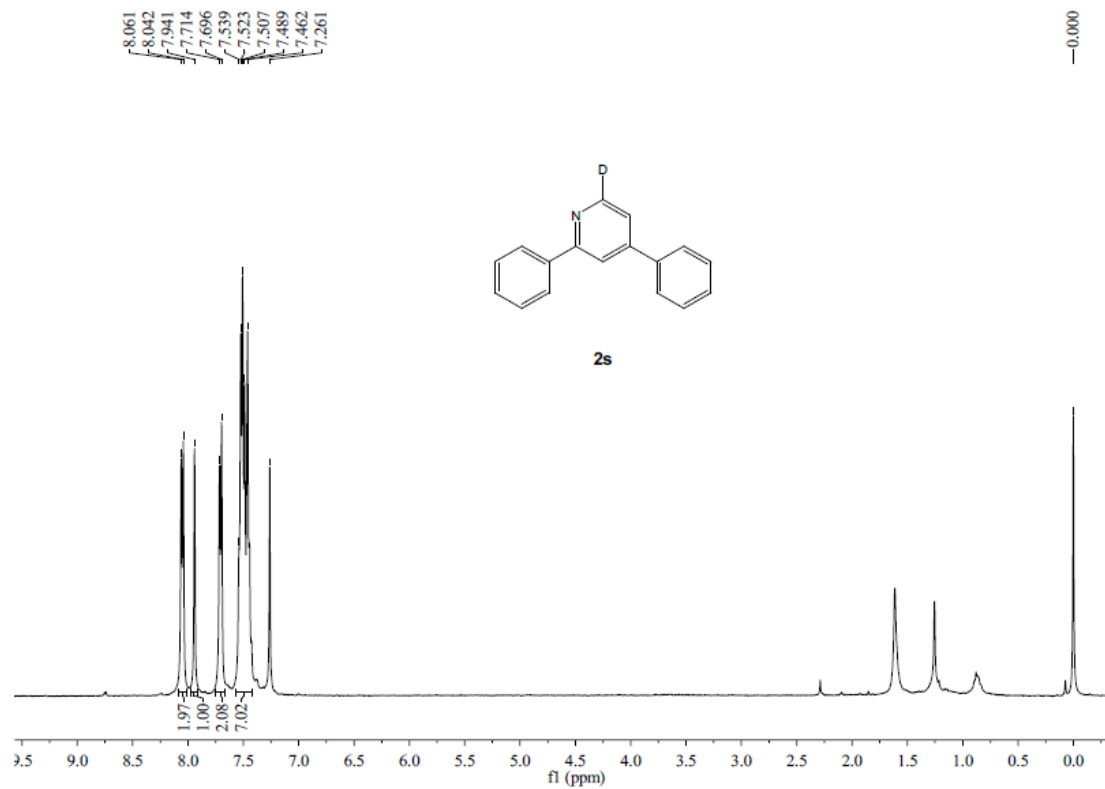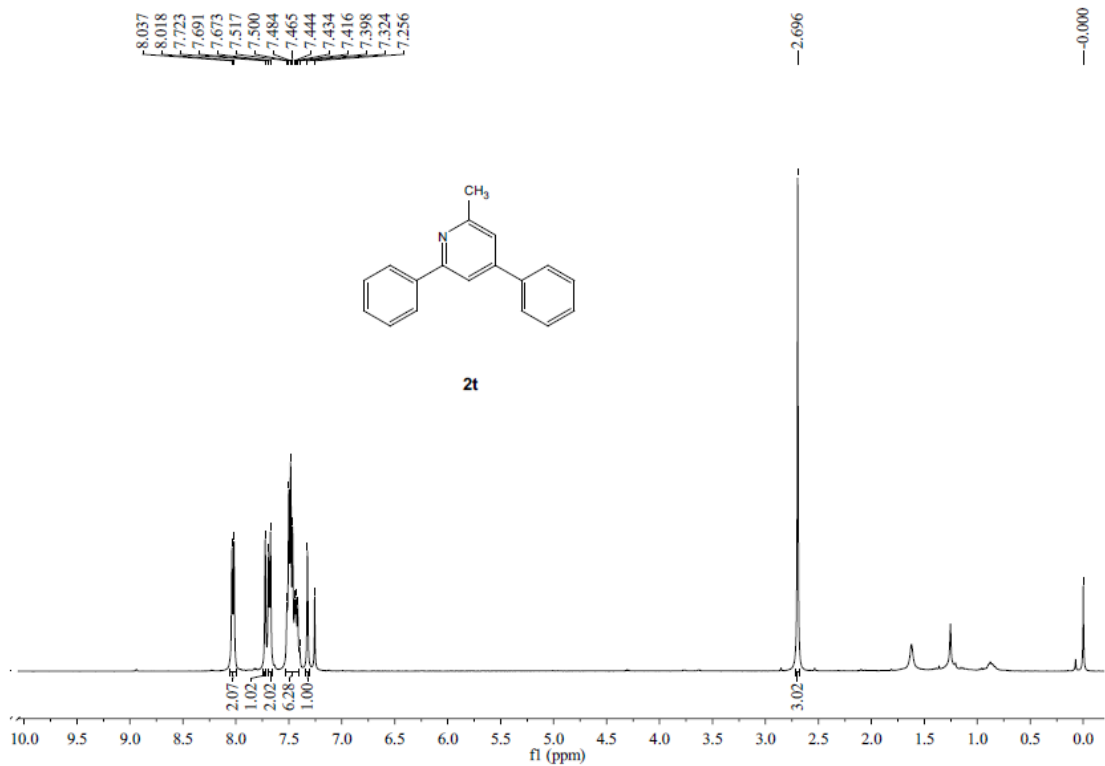

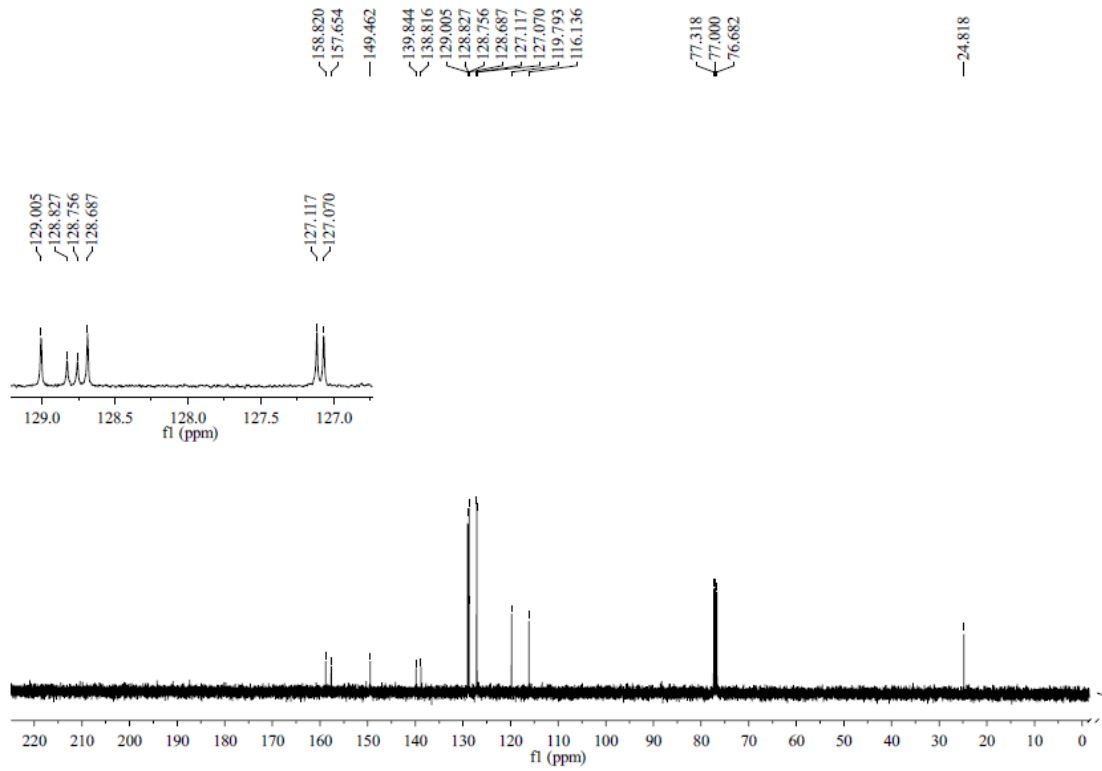

Supplement: c5ob00162e1.pdf [file c5ob00162e1.pdf]
